# Supplementary material for: Pyrolysis and Gasification of a Real Refuse-Derived Fuel (RDF): The Potential Use of the Products under a Circular Economy Vision
Source: MDPI journal article supplement (doi:10.3390/molecules27238114), 2022-11-22
Supplement: s1 [file s1]

# Pyrolysis and Gasification of a Real Refuse-Derived Fuel (RDF): The Potential Use of The Products under a Circular Economy Vision

**Michela Alfè <sup>1,2\*</sup>, Valentina Gargiulo <sup>1</sup>, Michele Porto <sup>3</sup>, Renata Migliaccio <sup>1</sup>, Adolfo Le Pera <sup>4</sup>, Miriam Sellaro <sup>4</sup>, Crescenzo Pellegrino <sup>4</sup>, Abraham A. Abe <sup>3</sup>, Massimo Urciuolo <sup>1</sup>, Paolino Caputo <sup>3</sup>, Pietro Calandra <sup>5</sup>, Valeria Loise <sup>3</sup>, Cesare Oliviero Rossi <sup>3,6\*</sup>, Giovanna Ruoppolo <sup>1</sup>**

<sup>1</sup> CNR-STEMS, National Research Council, Institute of Sciences and Technologies for Sustainable Energy and Mobility, P.le V. Tecchio 80, 80125 Napoli, Italy

<sup>2</sup> UdR INSTM-STEMS. P.le V. Tecchio 80, 80125 Napoli, Italy;

<sup>3</sup> Department of Chemistry and Chemical Technologies, University of Calabria, Via P. Bucci, Cubo 14/D, 87036 Rende (CS), Italy

<sup>4</sup> Calabra Maceri e Servizi s.p.a., via M. Polo 54, 87036 Rende (CS), Italy

<sup>5</sup> CNR-ISMN, National Research Council, Institute of Nanostructured Materials, Via Salaria km 29.300, 00015 Montelibretti (RM), Italy

<sup>6</sup> UdR INSTM della Calabria, Via P. Bucci, Cubo 14/D, 87036 Rende (CS).

\* Correspondence: [michela.alf@stems.cnr.it](mailto:michela.alf@stems.cnr.it) (M.A.); [cesare.oliviero@unical.it](mailto:cesare.oliviero@unical.it) (C.O.R.)

| <b>Table S1. Ash composition</b> |              |
|----------------------------------|--------------|
| <i>Element</i>                   | <i>wt. %</i> |
| Ca                               | 11.820       |
| K                                | 3.170        |
| Na                               | 2.675        |
| Al                               | 1.723        |
| Mg                               | 1.500        |
| Fe                               | 1.489        |
| Ti                               | 1.258        |
| P                                | 0.624        |
| Ba                               | 0.261        |
| Mn                               | 0.168        |
| Cr                               | 0.077        |
| Cu                               | 0.065        |
| Sr                               | 0.063        |
| Sn                               | 0.039        |
| Sb                               | 0.033        |
| B                                | 0.021        |
| Zn                               | 0.014        |
| Ni                               | 0.010        |
| Co                               | 0.007        |
| Pb                               | 0.007        |
| V                                | 0.003        |
| Li                               | 0.002        |
| As                               | 0.002        |
| Mo                               | 0.001        |

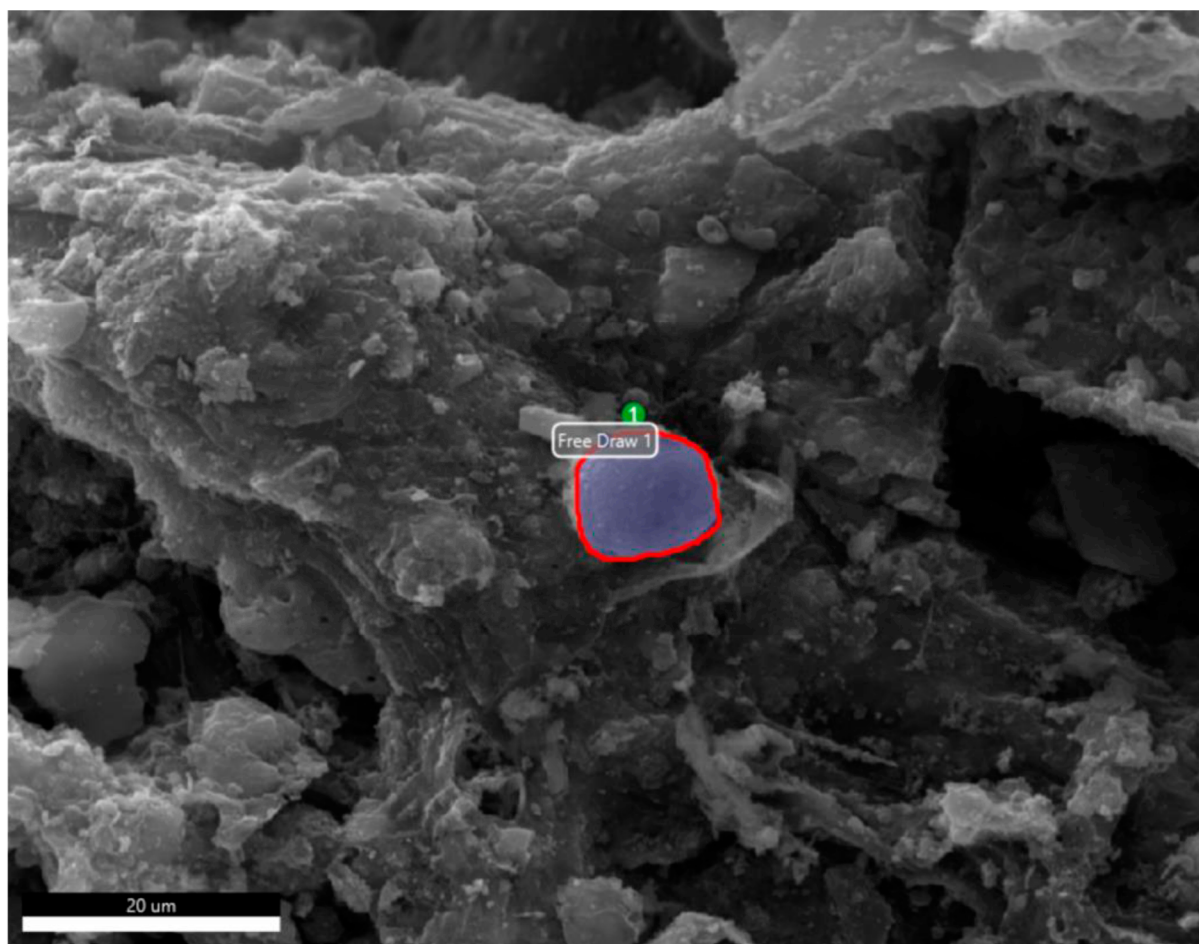

EDX Result: Map Sample Area 3 Area Draw 1

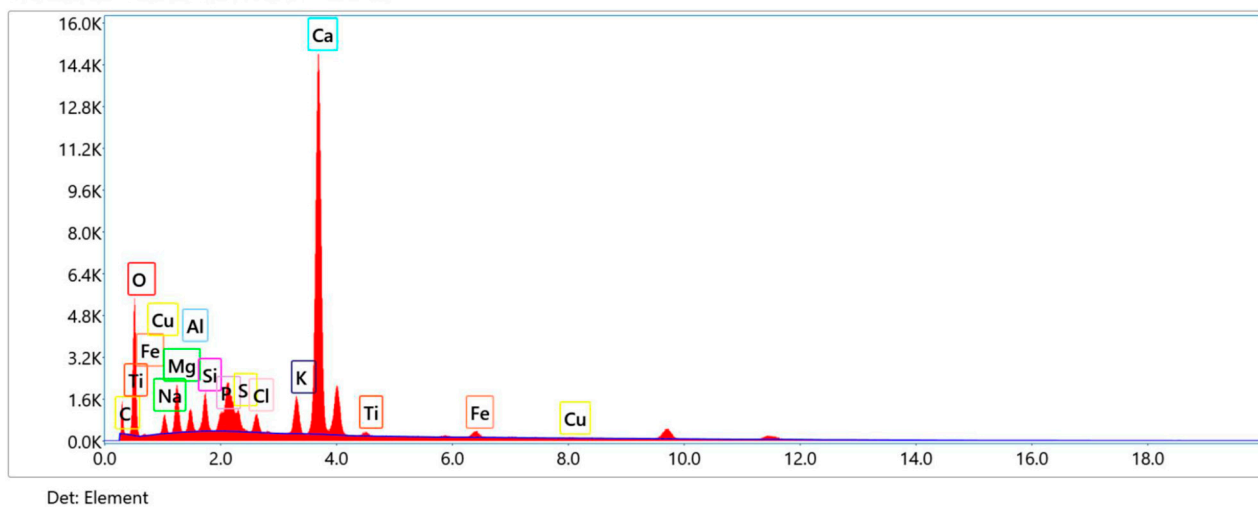

**Figure S1:** EDX analysis of char@750

**Table S2.** CS-F1@550 composition

| RT    | Area% | Library/ID                              | Quality match |
|-------|-------|-----------------------------------------|---------------|
| 5.41  | 0.15  | n-Hexane                                | 45            |
| 6.98  | 0.57  | Ethyl Acetate                           | 86            |
| 9.31  | 0.2   | Acetic acid                             | 86            |
| 11.18 | 0.28  | 2-Propanone, 1-hydroxy-                 | 50            |
| 17.73 | 0.14  | 2,4-Dimethyl-1-heptene                  | 90            |
|       |       | Cyclopentane, 1,2,3-trimethyl-          | 53            |
| 17.74 | 0.13  | 2,4-Dimethyl-1-heptene                  | 72            |
|       |       | 1-Heptene, 5-methyl-                    | 59            |
| 20.61 | 0.17  | E-11,13-Tetradecadien-1-ol              | 91            |
|       |       | 1-Nonene                                | 80            |
|       |       | 1-Hexene, 3-methyl-                     | 72            |
| 20.92 | 0.16  | Nonane                                  | 90            |
| 22.08 | 0.15  | Bicyclo[4.2.0]octa-1,3,5-triene         | 94            |
|       |       | 1,3,5,7-Cyclooctatetraene               | 93            |
| 22.66 | 0.13  | 2-Furanmethanol                         | 96            |
| 26.45 | 0.63  | 1-Decene                                | 96            |
|       |       | Cyclodecane                             | 90            |
| 26.72 | 0.23  | Decane                                  | 94            |
|       |       | Undecane                                | 90            |
| 27.70 | 0.13  | Benzaldehyde                            | 72            |
| 29.78 | 0.17  | Benzonitrile                            | 91            |
|       |       | 2-Ethynyl pyridine                      | 90            |
| 31.48 | 0.23  | 4-Methyl-2-heptene                      | 45            |
|       |       | 3-Heptene, 4-methyl-                    | 43            |
|       |       | Cyclohexane, 1-ethyl-2-propyl-          | 43            |
| 31.71 | 0.11  | Cyclopropane, 1-butyl-2-pentyl-, cis-   | 58            |
|       |       | Cyclopropane, 1-butyl-2-pentyl-, trans- | 52            |
|       |       | s-Tetrazine, 3,6-bis(dimethylamino)-    | 50            |
| 31.72 | 0.09  | 1-Heptanol, 6-methyl-                   | 45            |
|       |       | 3-Heptene, 4-methyl-                    | 43            |
| 32.00 | 1.03  | 1-Undecene                              | 91            |
|       |       | 7-Tetradecene, (Z)-                     | 90            |
|       |       | 3-Tetradecene, (Z)-                     | 90            |
| 32.24 | 0.49  | Undecane                                | 96            |
| 32.46 | 0.17  | Phenol                                  | 94            |
| 33.84 | 0.31  | Acetophenone                            | 91            |
| 35.46 | 0.05  | Phenol, 3-methyl-                       | 91            |
|       |       | p-Cresol                                | 90            |
| 35.47 | 0.04  | Phenol, 2-methyl-                       | 90            |
|       |       | Phenol, 3-methyl-                       | 87            |
| 35.55 | 0.08  | 1,6-Heptadiene, 3,5-dimethyl-           | 49            |
|       |       | 1,7-Nonadiene, 4,8-dimethyl-            | 47            |
|       |       | Hexanenitrile, 5-methyl-                | 43            |

|        |      |                                             |    |
|--------|------|---------------------------------------------|----|
| 36.53  | 0.49 | 1,2-Propanedione, 1-phenyl-                 | 70 |
|        |      | N-Methoxy-N-methylbenzamide                 | 64 |
|        |      | Benzoylformic acid                          | 64 |
| 36.99  | 0.56 | 9-Octadecen-1-ol, (Z)-                      | 86 |
|        |      | Cyclododecene                               | 55 |
|        |      | 1,13-Tetradecadiene                         | 50 |
| 37.21  | 1.18 | 1-Dodecene                                  | 93 |
|        |      | 3-Tetradecene, (Z)-                         | 91 |
|        |      | 5-Tetradecene, (E)-                         | 91 |
| 37.43  | 0.82 | Dodecane                                    | 95 |
| 37.82  | 0.25 | Pentanedinitrile, 2-methylene-              | 90 |
|        |      | 3-Hexenedinitrile                           | 87 |
| 38.08  | 0.45 | Cyclopropyl carbinol                        | 42 |
| 38.28  | 0.23 | 2-Norbornanone                              | 50 |
| 38.42  | 0.22 | Benzoic acid, ethyl ester                   | 81 |
| 38.79  | 0.25 | Pentanedinitrile                            | 72 |
|        |      | Cyclopropane, 1-propenyl-                   | 72 |
| 39.22  | 0.38 | Pentanedinitrile, 2-methyl-                 | 83 |
|        |      | Hexanedinitrile                             | 47 |
| 39.41  | 0.15 | D-Alanine, N-allyloxycarbonyl-, decyl ester | 52 |
|        |      | Azulene                                     | 46 |
| 39.82  | 0.05 | Phenol, 2,6-dimethyl-                       | 96 |
|        |      | Phenol, 2,5-dimethyl-                       | 93 |
| 40.13  | 0.08 | Ethanone, 1-(3-methylphenyl)-               | 72 |
|        |      | Ethanone, 1-(4-methylphenyl)-               | 70 |
| 41.396 | 7.13 | Benzoic acid                                | 96 |
| 41.591 | 0.03 | Benzoic acid                                | 94 |
| 41.921 | 0.27 | 1-Pentadecyne                               | 92 |
|        |      | 11-Hexadecen-1-ol, acetate, (Z)-            | 70 |
|        |      | Bicyclo[4.1.0]heptane, 2-methyl-            | 60 |
| 42.094 | 1.39 | 1-Tridecene                                 | 98 |
| 42.285 | 0.89 | Tridecane                                   | 97 |
| 42.93  | 0.9  | Cyclopentane, (2-methylbutyl)-              | 46 |
|        |      | Cyclohexane, 1,2,4-trimethyl-               | 43 |
| 43.33  | 0.29 | 1-Ethyl-2,2,6-trimethylcyclohexane          | 43 |
|        |      | Cyclopentane, hexyl-                        | 42 |
|        |      | Cyclohexane, 1,2,4-trimethyl-               | 41 |
| 43.73  | 0.92 | Cyclohexane, 1,1-dimethyl-2-propyl          | 46 |
|        |      | 4-Isopropyl-1,3-cyclohexanedione            | 38 |
| 44.81  | 0.14 | Benzocycloheptatriene                       | 86 |
|        |      | 1H-Indene, 1-ethylidene-                    | 64 |
|        |      | Naphthalene, 1-methyl-                      | 62 |
| 45.01  | 0.1  | 3-Decene, 2,2-dimethyl-, (E)-               | 38 |
|        |      | Cyclohexane, 1,1,2-trimethyl-               | 38 |
| 45.39  | 0.1  | 1H-Inden-1-one, 2,3-dihydro-                | 70 |
|        |      | Pyrazolo(2,3-a)pyridine, 7-methyl-          | 41 |

|        |      |                                                          |           |
|--------|------|----------------------------------------------------------|-----------|
| 45.58  | 0.17 | 1-Undecene, 5-methyl-                                    | 44        |
|        |      | Naphthalene, 1-methyl-                                   | 35        |
| 46.05  | 0.21 | Benzoic acid, 4-methyl-                                  | 95        |
| 46.32  | 0.12 | 1,2-Benzenedicarbonitrile                                | 60        |
|        |      | 1,3-Dicyanobenzene                                       | 60        |
| 46.44  | 0.32 | Oxiranecarboxaldehyde, 3-methyl-3-(4-methyl-3-pentenyl)- | 49        |
|        |      | 7-Tetradecene                                            | 45        |
| 46.53  | 0.39 | Z,Z-2,15-Octadecadien-1-ol acetate                       | 94        |
|        |      | 1,12-Tridecadiene                                        | 93        |
|        |      | cis-9-Tetradecen-1-ol                                    | 87        |
| 46.69  | 2.19 | 1-Tetradecene                                            | 98        |
|        |      | 2-Tetradecene, (E)-                                      | 98        |
| 46.851 | 1.13 | <b>Tetradecane</b>                                       | <b>98</b> |
| 47.16  | 0.17 | Cyclotetradecane                                         | 56        |
|        |      | 3-Tetradecene, (E)-                                      | 49        |
|        |      | Cyclopentane, nonyl-                                     | 46        |
| 47.71  | 0.14 | 1-Propanol, 2,2-dimethyl-, benzoat                       | 76        |
|        |      | Ethanol, 2,2,2-trichloro-, benzoat                       | 38        |
| 48.455 | 1.93 | <b>Biphenyl</b>                                          | <b>95</b> |
| 49.99  | 0.09 | Benzonitrile, 4-acetyl-                                  | 70        |
|        |      | 3-Acetylbenzonitrile                                     | 70        |
| 50.22  | 0.29 | Methanol, oxo-, benzoate                                 | 47        |
|        |      | 2-Chloroethyl benzoate                                   | 46        |
|        |      | Benzoic acid, ethyl ester                                | 46        |
| 50.65  | 0.85 | Diphenylmethane                                          | 96        |
|        |      | 1,1'-Biphenyl, 2-methyl-                                 | 83        |
| 50.88  | 0.48 | 9-Octadecen-1-ol, (Z)-                                   | 94        |
|        |      | 11-Hexadecen-1-ol, (Z)-                                  | 91        |
| 51.02  | 2.32 | 1-Pentadecene                                            | 98        |
| 51.15  | 1.29 | Pentadecane                                              | 97        |
|        |      | Heptadecane                                              | 91        |
| 52.01  | 0.08 | Cycloheptane, methyl-                                    | 55        |
| 52.55  | 0.59 | Cyclohexane, 1,2,4-trimethyl-                            | 42        |
|        |      | Cyclohexane, 1,1,2-trimethyl-                            | 41        |
| 52.98  | 0.3  | 1,1'-Biphenyl, 4-methyl-                                 | 94        |
|        |      | 1,1'-Biphenyl, 3-methyl-                                 | 92        |
| 53.42  | 0.34 | 1,1'-Biphenyl, 3-methyl-                                 | 96        |
|        |      | 1,1'-Biphenyl, 4-methyl-                                 | 93        |
| 53.67  | 0.2  | 2-Methyl-2-docosene                                      | 68        |
|        |      | 9-Tricosene, (Z)-                                        | 58        |
|        |      | Ethanone, 1-cyclopentyl-                                 | 46        |
| 54.32  | 0.07 | 1-Pentadecene                                            | 46        |
|        |      | Cyclopentane, 1-butyl-2-ethyl-                           | 35        |
| 54.99  | 0.57 | 1,9-Tetradecadiene                                       | 93        |
|        |      | 9-Octadecen-1-ol, (E)-                                   | 93        |
| 55.11  | 2.31 | Cetene                                                   | 98        |

|        |      |                                                                          |    |
|--------|------|--------------------------------------------------------------------------|----|
| 55.23  | 1.3  | Eicosane                                                                 | 98 |
|        |      | Hexadecane                                                               | 98 |
| 55.68  | 0.25 | Bicyclo[2.2.1]heptane-2,5-dione, 1,7,7-trimethyl-                        | 62 |
|        |      | 3-Hexene, 2,2,5,5-tetramethyl-, (Z)-                                     | 49 |
|        |      | Borinic acid, diethyl-, 1-cyclododecen-1-yl ester                        | 38 |
| 56.08  | 0.08 | Cyclopentane, 1,1'-[3-(2-cyclopentylethyl)-1,5-pentanedyl]bis-           | 70 |
|        |      | 3-Tetradecene, (Z)-                                                      | 60 |
|        |      | Cyclohexadecane                                                          | 58 |
| 56.59  | 0.21 | 4-Methyl-2,6-dihydroxyquinoline                                          | 43 |
|        |      | 3-Hydroxy-4-phenyl-5-butyl-1,2,4-triazole                                | 43 |
|        |      | 2H-1-Benzopyran-2-one, 7-amino-4-methyl-                                 | 38 |
| 57.79  | 0.61 | Fluorene                                                                 | 91 |
| 58.03  | 0.1  | Cyclopentane, 1-pentyl-2-propyl-                                         | 52 |
|        |      | Cyclopentanone, 3-(6,6-dimethyl-5-oxo-2-heptenyl)-, (E)-                 | 45 |
|        |      | Trifluoroacetoxy hexadecane                                              | 44 |
| 58.40  | 0.17 | Isophthalic acid, ethyl 2-methoxyethyl ester                             | 64 |
|        |      | Terephthalic acid, 3,5-difluorophenyl ethyl ester                        | 64 |
|        |      | Isophthalic acid, 2,5-dimethylphenyl ethyl ester                         | 59 |
| 58.67  | 0.43 | 8-Heptadecene                                                            | 83 |
|        |      | Cyclotetradecane                                                         | 74 |
|        |      | 2- Chloropropionic acid, hexadecylester                                  | 64 |
| 58.76  | 0.2  | Cyclopentadecane                                                         | 90 |
|        |      | 7-Tetradecene, (Z)-                                                      | 86 |
|        |      | Z-5-Nonadecene                                                           | 83 |
| 58.98  | 2.8  | E-14-Hexadecenal                                                         | 99 |
|        |      | 3-Heptadecene, (Z)-                                                      | 99 |
|        |      | 1-Heptadecene                                                            | 98 |
| 59.08  | 1.28 | Heptadecane                                                              | 98 |
| 59.315 | 0.22 | 1-Heneicosyl formate                                                     | 90 |
|        |      | 1-Eicosanol                                                              | 90 |
|        |      | 1-Nonadecene                                                             | 89 |
| 59.70  | 0.16 | Octatriacontyl pentafluoropropionate                                     | 53 |
|        |      | Hexatriacontyl pentafluoropropionate                                     | 53 |
|        |      | Tetrapentacontane, 1,54-dibromo-                                         | 53 |
| 59.79  | 0.09 | 9-Tricosene, (Z)-                                                        | 98 |
|        |      | Z-11-Tetradecen-1-ol trifluoroacetate                                    | 97 |
|        |      | 2,6,10,14-Tetramethyl-7-(3-methylpent-4-enylidene) pentadecane           | 93 |
| 59.97  | 1.49 | Benzophenone                                                             | 95 |
| 60.252 | 0.15 | Cyclopropane carboxamide, 2-cyclopropyl-2-methyl-N-(1-cyclopropylethyl)- | 38 |
|        |      | 2-Propanone, 3-chloro-1-(1,1-dimethylethyl)-1-phenylthio-                | 35 |
| 60.75  | 0.13 | 9-Tricosene, (Z)-                                                        | 74 |
|        |      | E-11(13-Methyl)tetradecen-1-ol acetate                                   | 64 |
| 60.94  | 0.47 | Cyclohexane, 1-ethyl-2-propyl-                                           | 38 |
|        |      | Cyclohexane, (1-octylonyl)-                                              | 35 |
| 61.71  | 0.19 | 1-Pentadecene                                                            | 62 |
|        |      | 3-Hexadecene, (Z)-                                                       | 58 |

|       |      |                                                                                       |      |
|-------|------|---------------------------------------------------------------------------------------|------|
|       |      | 2-Methyl-2-docosene                                                                   | 55   |
| 61.97 | 0.35 | Sulfurous acid, octadecyl 2-propyl ester                                              | 38   |
|       |      | Nonane, 2-methyl-3-methylene-                                                         | 30   |
|       |      | Cyclopentane, propyl-                                                                 | 30   |
| 62.66 | 4.68 | E-15-Heptadecenal                                                                     | 99   |
|       |      | 1-Octadecene                                                                          | 99   |
| 62.89 | 0.11 | 1-Cyclohexylnonene                                                                    | 70   |
|       |      | 1,3-Dioxolane, 4-ethyl-5-octyl-2,2-bis(trifluoromethyl)-, trans-                      | 53   |
|       |      | 1,19-Eicosadiene                                                                      | 49   |
| 62.94 | 0.15 | 2-Methyl-2-docosene                                                                   | 84   |
|       |      | 4-Methyl-dodec-3-en-1-ol                                                              | 52   |
|       |      | Elaidic acid, isopropyl ester                                                         | 49   |
| 63.15 | 0.37 | 2-Methyl-2-docosene                                                                   | 83   |
|       |      | 9-Tricosene, (Z)-                                                                     | 64   |
|       |      | 5-Octadecene, (E)-                                                                    | 45   |
| 63.48 | 0.37 | 5,8-Methano-4H-3,1-benzoxazine-2-thione, 1,2,4a-rel,5-trans,8-trans,8a-cis-hexahydro- | 42   |
|       |      | Acetamide, 2,2,2-trifluoro-N-(3-methyl-4-nitro-5-pyrazolyl)-                          | 42   |
|       |      | Propanedinitrile, (1-methylethylidene)-                                               | 38   |
| 63.79 | 0.39 | 11,13-Dimethyl-12-tetradecen-1-olacetate                                              | 64   |
|       |      | 6,11-Dimethyl-2,6,10-dodecatrien-1-ol                                                 | 45   |
|       |      | Cyclohexane, 1,1,3,5-tetramethyl-,trans-                                              | 38   |
| 64.28 | 0.8  | Hexanedinitrile                                                                       | 64   |
|       |      | Pentanedinitrile, 2-methyl-                                                           | 64   |
|       |      | p-Benzoquinone                                                                        | 53   |
| 64.48 | 0.2  | [1,2,4]Triazolo[1,5-a]pyrimidin-7-ol, 6-amino-5-methyl-2-propyl-                      | 0 49 |
|       |      | [1,1'-Biphenyl]-2-carbonitrile                                                        | 46   |
|       |      | Imidazolo[1,2-a]pyrimidine-2,5(1H,3H)-dione, 3,7-dimethyl-                            | 42   |
| 64.86 | 0.51 | 9H-Fluoren-9-one                                                                      | 87   |
| 65.24 | 0.16 | 1-Tricosene                                                                           | 90   |
|       |      | 9-Tricosene, (Z)-                                                                     | 86   |
|       |      | 7-Hexadecene, (Z)-                                                                    | 64   |
| 65.55 | 0.53 | Silacyclopent-2-ene, 1,1-difluoro-                                                    | 53   |
|       |      | 2-Pentenitrile                                                                        | 53   |
| 65.84 | 0.13 | 7,8-Diphenylbicyclo[4.2.1]nona-2,4,7-triene                                           | 83   |
|       |      | 1,10b(2H)-Dihydropyrano[3,4,5-jk]fluorene                                             | 70   |
|       |      | Ethanone, 2-imino-1,2-diphenyl-, semicarbazone                                        | 60   |
| 65.97 | 0.2  | 2-Methyl-2-docosene                                                                   | 94   |
|       |      | 9-Tricosene, (Z)-                                                                     | 56   |
|       |      | Z-5-Nonadecene                                                                        | 55   |
| 66.15 | 4.34 | 1-Nonadecene                                                                          | 99   |
|       |      | Z-5-Nonadecene                                                                        | 98   |
|       |      | 1-Heptadecene                                                                         | 95   |
| 66.4  | 0.27 | 9-Tricosene, (Z)-                                                                     | 80   |
|       |      | Octadec-9-enoic acid                                                                  | 78   |
| 67.56 | 0.19 | Ethanone, 1-[1,1'-biphenyl]-4-yl-                                                     | 70   |



|       |      |                                                                  |    |
|-------|------|------------------------------------------------------------------|----|
|       |      | Ethanone, 1-[1,1'-biphenyl]-3-yl-                                | 55 |
| 68.30 | 0.3  | 2-Methyl-2-butenenitrile                                         | 68 |
|       |      | 3-Butenenitrile, 2-methyl-                                       | 64 |
|       |      | Butanenitrile, 2-methylene-                                      | 58 |
| 68.50 | 0.24 | Pyridine-3-carboxamide, oxime, N-(2-trifluoromethylphenyl)-      | 91 |
|       |      | 2-Methyl-2-docosene                                              | 46 |
|       |      | Cyclohexane, 1-ethyl-2-propyl-                                   | 45 |
| 69.45 | 0.33 | 2-Methyl-2-docosene                                              | 89 |
|       |      | Pyridine-3-carboxamide, oxime, N-(2-trifluoromethylphenyl)-      | 80 |
|       |      | Cyclopentane, 1,1'-[3-(2-cyclopentylethyl)-1,5-pentanedyl]bis-   | 80 |
| 69.67 | 4.22 | 9-Tricosene, (Z)-                                                | 99 |
|       |      | 5-Eicosene, (E)-                                                 | 96 |
|       |      | Pentafluoropropionic acid, octadecyl ester                       | 94 |
| 69.94 | 0.2  | Oxacyclotetradecan-2-one, 14-methyl                              | 70 |
|       |      | 5-Octadecene, (E)-                                               | 48 |
|       |      | 13-Borabicyclo[7.3.0]tridecane, 13-butoxy-, (Z)- or (E)-         | 45 |
| 71.43 | 0.27 | 2-Ethylacridine                                                  | 38 |
|       |      | Benzene, 2-[(tert-butyl)dimethylsilyloxy]-1-isopropyl-4-methyl-  | 38 |
| 71.63 | 0.4  | 11,13-Dimethyl-12-tetradecen-1-ol acetate                        | 64 |
|       |      | 1-Cyclohexyl-1-(4-methylcyclohexyl)ethane                        | 46 |
|       |      | 6-Nitroundec-5-ene                                               | 43 |
| 72.99 | 3.2  | Hexatriacontyl pentafluoropropionate                             | 90 |
|       |      | Octatriacontyl pentafluoropropionate                             | 90 |
|       |      | Octacosyl trifluoroacetate                                       | 86 |
| 73.69 | 0.25 | Pyridine-3-carboxamide, oxime, N-(2-trifluoromethylphenyl)-      | 90 |
|       |      | Hexahydropyridine, 1-methyl-4-[4,5-dihydroxyphenyl]-             | 70 |
|       |      | 1H-Indole, 5-methyl-2-phenyl-                                    | 38 |
| 73.98 | 4.17 | Z-5-Nonadecene                                                   | 94 |
|       |      | 1-Nonadecene                                                     | 94 |
|       |      | Trifluoroacetoxy hexadecane                                      | 93 |
| 74.30 | 0.3  | 1-Heneicosanol                                                   | 91 |
|       |      | 9-Tricosene, (Z)-                                                | 59 |
| 77.90 | 0.11 | 2,4-Cyclohexadien-1-one, 3,5-bis(1,1-dimethylethyl)-4-hydroxy-   | 74 |
|       |      | 1,2-Dihydroanthra[1,2-d]thiazole-2,6,11-trione                   | 44 |
|       |      | Cyclohexane, 1,1'-(2-propyl-1,3-propanediyl)bis-                 | 43 |
| 8.42  | 0.31 | Pyridine-3-carboxamide, oxime, N-(2-trifluoromethylphenyl)-      | 96 |
|       |      | Fumaric acid, pent-4-en-2-yl tridecyl ester                      | 38 |
| 79.50 | 4    | 1-Docosene                                                       | 97 |
|       |      | 11-Tricosene                                                     | 97 |
|       |      | Cycloeicosane                                                    | 93 |
| 79.90 | 0.36 | 1,3-Dioxolane, 4-ethyl-5-octyl-2,2-bis(trifluoromethyl)-, cis-   | 50 |
|       |      | 5-Methyl-Z-5-docosene                                            | 45 |
|       |      | 1,3-Dioxolane, 4-ethyl-5-octyl-2,2-bis(trifluoromethyl)-, trans- | 43 |
| 82.14 | 0.48 | p-Terphenyl                                                      | 55 |
|       |      | m-Terphenyl                                                      | 42 |
| 83.78 | 0.51 | Bicyclo[3.1.1]heptan-3-one, 6,6-dimethyl-2-(2-methylpropyl)-     | 46 |

|        |      |                                                      |    |
|--------|------|------------------------------------------------------|----|
| 84.17  | 0.71 | S-Benzoyl-N-(p-methoxybenzylidene) thiohydroxylamine | 58 |
|        |      | 3-Benzoylamino-2-methyl-butyric acid, ethyl ester    | 52 |
|        |      | 4-(3-Acetylphenyliminomethyl)phenyl benzoate         | 52 |
| 85.31  | 0.2  | m-Terphenyl                                          | 56 |
|        |      | p-Terphenyl                                          | 42 |
| 86.68  | 3.69 | 1-Nonadecene                                         | 95 |
|        |      | 1-Decanol, 2-hexyl-                                  | 91 |
|        |      | 11-Tricosene                                         | 89 |
| 95.25  | 1.25 | Octatriacontyl pentafluoropropionate                 | 91 |
|        |      | 1-Hexadecanol, 2-methyl-                             | 90 |
|        |      | Tetratriacontyl pentafluoropropionate                | 64 |
| 95.28  | 0.6  | Eicosane                                             | 64 |
|        |      | Tetratriacontyl heptafluorobutyrate                  | 60 |
|        |      | Octacosyl trifluoroacetate                           | 60 |
| 95.45  | 0.76 | 9-Tricosene, (Z)-                                    | 92 |
|        |      | 1-Tricosene                                          | 84 |
| 96.12  | 3.69 | 1-Nonadecene                                         | 95 |
|        |      | Octatriacontyl pentafluoropropionate                 | 91 |
|        |      | Dotriacontyl heptafluorobutyrate                     | 91 |
| 101.75 | 0.17 | 9-Tricosene, (Z)-                                    | 90 |
| 105.02 | 0.48 | 9-Tricosene, (Z)-                                    | 91 |
|        |      | Fumaric acid, 2,4,6-trichlorophenyl tridecyl ester   | 42 |
| 108.61 | 1.93 | 1-Tricosene                                          | 95 |
|        |      | Tetratriacontyl pentafluoropropionate                | 93 |
|        |      | Tetratriacontyl heptafluorobutyrate                  | 93 |
| 108.64 | 1.59 | 1-Nonadecene                                         | 96 |
|        |      | Octatriacontyl pentafluoropropionate                 | 93 |
|        |      | Octacosyl trifluoroacetate                           | 93 |
|        | 1.54 | Others                                               |    |

**Table S3.** CS-F2@550 composition

| RT    | Area% | Library/ID                               | Qual |
|-------|-------|------------------------------------------|------|
| 5.41  | 0.26  | n-Hexane                                 | 38   |
| 6.58  | 0.21  | Cyclopentane, methyl-                    | 45   |
|       |       | 1-Pentene, 2-methyl-                     | 38   |
| 6.98  | 1.37  | Ethyl Acetate                            | 86   |
| 9.29  | 3.17  | Acetic acid                              | 90   |
| 11.18 | 3.61  | 2-Propanone, 1-hydroxy-                  | 59   |
| 13.98 | 0.17  | Pyridine                                 | 91   |
| 14.44 | 0.19  | Propanoic acid                           | 91   |
| 16.92 | 0.33  | 2-Butoxyethyl acetate                    | 33   |
| 18.84 | 0.57  | Propanoic acid, 2-oxo-, methyl ester     | 72   |
|       |       | Butyric acid hydrazide                   | 39   |
| 20.62 | 0.5   | Pent-2-ynal                              | 72   |
|       |       | 2-Cyclopenten-1-one                      | 68   |
| 22.10 | 0.1   | Styrene                                  | 93   |
|       |       | 1,3,5,7-Cyclooctatetraene                | 87   |
| 22.66 | 2.3   | 2-Furanmethanol                          | 98   |
| 23.11 | 0.31  | 2-Butanone, 3-methyl-                    | 53   |
|       |       | 2-Propanone, 1-(acetyloxy)-              | 45   |
|       |       | Acetic acid ethenyl ester                | 38   |
| 26.36 | 1.56  | 2-Cyclopenten-1-one, 2-hydroxy-          | 80   |
|       |       | 1,2-Cyclopentanedione                    | 72   |
|       |       | Cyclohexanone                            | 64   |
| 26.75 | 0.45  | Cycloheptane                             | 38   |
|       |       | Nonahexacontanoic acid                   | 38   |
|       |       | 2-Cyclohexen-1-ol                        | 38   |
| 27.72 | 0.81  | Benzaldehyde                             | 90   |
| 27.94 | 0.98  | 2(5H)-Furanone                           | 86   |
|       |       | 2-Butenal, 2-methyl-                     | 43   |
| 28.43 | 0.35  | 2-Furancarboxaldehyde, 5-methyl-         | 87   |
| 29.08 | 0.35  | Cyclopropane, methylmethylene-           | 91   |
|       |       | 2-Cyclopenten-1-one, 3-methyl-           | 90   |
|       |       | 2-Cyclopenten-1-one, 2-methyl-           | 87   |
| 29.79 | 0.84  | Benzonitrile                             | 95   |
| 29.96 | 0.27  | 4(1H)-Pyrimidinone, 6-methyl-            | 64   |
|       |       | 1H-Imidazole-2-carboxaldehyde, 1-methyl- | 47   |
|       |       | Resorcinol                               | 46   |
| 31.49 | 0.17  | 1-Heneicosyl formate                     | 74   |
|       |       | Cyclooctane, methyl-                     | 52   |
|       |       | Cyclopentane, propyl-                    | 52   |
| 32.05 | 1.79  | 2-Cyclopenten-1-one, 2-hydroxy-3-methyl- | 94   |
|       |       | 1,2-Cyclopentanedione, 3-methyl-         | 91   |
| 32.25 | 0.38  | Undecane                                 | 91   |
|       |       | Dodecane                                 | 80   |

|       |      |                                                               |    |
|-------|------|---------------------------------------------------------------|----|
| 32.47 | 0.52 | Phenol                                                        | 94 |
|       |      | Phosphonic acid, (p-hydroxyphenyl)                            | 90 |
| 33.84 | 1.11 | Acetophenone                                                  | 94 |
| 34.59 | 0.18 | Benzoic acid, methyl ester                                    | 70 |
| 35.17 | 0.51 | Phenol, 2-methoxy-                                            | 87 |
|       |      | Mequinol                                                      | 81 |
| 35.47 | 0.13 | Phenol, 2-methyl-                                             | 94 |
|       |      | Phenol, 3-methyl-                                             | 91 |
| 35.93 | 0.44 | Propanedinitrile, dimethyl-                                   | 50 |
|       |      | Propanedinitrile, (1-methylpropylidene)-                      | 43 |
|       |      | 2-Methoxy-3-nitropyridine                                     | 22 |
| 36.54 | 2.13 | S-Benzoyl-N-(p-nitrobenzylidene)thiohydroxylamine             | 53 |
|       |      | Benzenepropanenitrile, .beta.-oxo-                            | 53 |
|       |      | Benzenecetic acid, .alpha.-oxo-,methyl ester                  | 53 |
| 36.94 | 1.46 | Phenol, 3-methyl-                                             | 83 |
|       |      | Phenol, 2-methyl-                                             | 55 |
| 37.22 | 0.85 | Cyclododecane                                                 | 91 |
|       |      | 1-Tetradecene                                                 | 87 |
|       |      | Pentafluoropropionic acid, decyl ester                        | 86 |
| 37.43 | 0.69 | Dodecane                                                      | 93 |
| 37.84 | 1.06 | 3-Hexenedinitrile                                             | 91 |
|       |      | Pentanedinitrile, 2-methylene-                                | 91 |
| 38.10 | 2.79 | Glutaraldehyde                                                | 38 |
|       |      | 1-Isopropyl diaziridine                                       | 38 |
|       |      | Cyclopropyl carbinol                                          | 36 |
| 38.29 | 1.48 | 3-Hexenedinitrile                                             | 52 |
|       |      | 3-Penten-1-yne, (E)-                                          | 43 |
|       |      | 1-Penten-3-yne                                                | 43 |
| 38.43 | 0.47 | Benzoic acid, ethyl ester                                     | 91 |
| 38.81 | 1.03 | Pentanedinitrile                                              | 83 |
|       |      | Cyclobutanecarbonitrile                                       | 78 |
|       |      | 2-Pentenitrile                                                | 72 |
| 39.23 | 2.07 | Pentanedinitrile, 2-methyl-                                   | 91 |
| 39.40 | 0.21 | Naphthalene                                                   | 60 |
|       |      | l-Alanine, N-allyloxycarbonyl-, butyl ester                   | 58 |
| 40.31 | 0.28 | Pentanedinitrile, 2-methyl-                                   | 38 |
|       |      | Bicyclo[3.1.0]hexan-2-one                                     | 32 |
| 41.34 | 8.02 | Benzoic acid                                                  | 96 |
| 41.65 | 0.13 | Benzoic acid                                                  | 94 |
| 41.93 | 0.38 | Cyclododecene                                                 | 43 |
|       |      | 1,11-Dodecadiene                                              | 41 |
|       |      | 1,2,4-Triazol-4-amine, 5-methyl-3-(3,5-dimethylpyrazol-1-yl)- | 38 |
| 42.11 | 0.98 | 1-Tridecene                                                   | 99 |
|       |      | Cyclododecane                                                 | 91 |
| 42.30 | 1.04 | Tridecane                                                     | 96 |
| 42.94 | 0.91 | Cyclohexane, 1,1-dimethyl-2-propyl                            | 43 |

|       |      |                                                                             |    |
|-------|------|-----------------------------------------------------------------------------|----|
|       |      | 1-Hexene, 2,5,5-trimethyl-                                                  | 43 |
|       |      | Cyclohexane, 1,2,3-trimethyl-, (1.alpha.,2.beta.,3.alpha.)-                 | 41 |
| 43.34 | 0.84 | Fluoren-9-ol, 3,6-dimethoxy-9-(2-phenylethynyl)-                            | 43 |
|       |      | Silane, (1,1-dimethylethyl)dimethyl(nonadecyloxy)-                          | 27 |
|       |      | (3-Amino-6-thiophen-2-yl-thieno[2,3-b]pyridin-2-yl)-thiophen-2-yl-methanone | 27 |
| 43.72 | 2.03 | 4-Octene, 2,3,6-trimethyl-                                                  | 50 |
|       |      | Cyclohexane, 1,1,4,4-tetramethyl-                                           | 46 |
|       |      | 1-Pentene, 3,3-dimethyl-                                                    | 46 |
| 45.43 | 0.11 | 2(3H)-Furanone, dihydro-5-pentyl-                                           | 53 |
|       |      | 2(3H)-Furanone, 5-ethyl-dihydro-                                            | 52 |
|       |      | 2,2-Dimethylvaleroyl chloride                                               | 50 |
| 45.46 | 0.03 | 4,7,7-Trimethyl-5-(tetrahydropyran-2-yloxy)-bicyclo[2.2.1]heptan-2-one      | 50 |
|       |      | Tetrahydrofuran, 2-methyl-5-pentyl                                          | 50 |
|       |      | 2H-Pyran-2-ol, tetrahydro-                                                  | 47 |
| 45.69 | 0.46 | 5-Hydroxymethylfurfural                                                     | 52 |
|       |      | 4-Mercaptophenol                                                            | 43 |
|       |      | 2-Pyrazoline, 5-ethyl-1,4-dimethyl                                          | 38 |
| 46.06 | 0.11 | Benzoic acid, 4-methyl-                                                     | 70 |
| 46.08 | 0.12 | Benzoic acid, 4-methyl-                                                     | 93 |
| 46.53 | 0.39 | 1,13-Tetradecadiene                                                         | 97 |
|       |      | 1-Cyclohexylheptene                                                         | 87 |
| 46.70 | 1.5  | 2-Tetradecene, (E)-                                                         | 98 |
|       |      | 1-Tetradecene                                                               | 97 |
|       |      | Cyclotetradecane                                                            | 90 |
| 46.86 | 0.62 | Tetradecane                                                                 | 98 |
| 48.47 | 1.14 | Biphenyl                                                                    | 81 |
| 50.24 | 0.55 | 2-Chloroethyl benzoate                                                      | 93 |
|       |      | Benzoic acid, ethyl ester                                                   | 58 |
| 50.66 | 0.18 | Diphenylmethane                                                             | 93 |
| 50.89 | 0.09 | 5-Nonadecen-1-ol                                                            | 78 |
|       |      | Undecanenitrile, 11-bromo-                                                  | 70 |
|       |      | (4-Methyl-pent-3-enyl)-cyclohexane                                          | 64 |
| 51.03 | 1.18 | 1-Pentadecene                                                               | 97 |
| 51.17 | 0.42 | Pentadecane                                                                 | 96 |
| 52.34 | 0.31 | Ethyl 4-cyanobenzoate                                                       | 81 |
|       |      | Benzoic acid, 4-cyano-                                                      | 68 |
| 52.57 | 0.99 | Benzamide, N-(aminocarbonyl)-                                               | 55 |
|       |      | Phenol, 2-methoxy-3-(2-propenyl)-                                           | 45 |
| 54.99 | 0.11 | 13-Oxabicyclo[10.1.0]tridecane                                              | 91 |
|       |      | 1-Cyclohexylheptene                                                         | 90 |
|       |      | E,Z-2,13-Octadecadien-1-ol                                                  | 90 |
| 55.11 | 0.88 | Cetene                                                                      | 96 |
|       |      | Z-8-Hexadecene                                                              | 95 |
|       |      | Pentafluoropropionic acid, 4-hexadecyl ester                                | 94 |
| 55.23 | 0.46 | Tetracosane                                                                 | 97 |
|       |      | Hexadecane                                                                  | 96 |

|       |      |                                                                     |    |
|-------|------|---------------------------------------------------------------------|----|
| 56.60 | 0.52 | Precocene I                                                         | 38 |
|       |      | 4-Methyl-2,6-dihydroxyquinoline                                     | 38 |
| 57.76 | 0.28 | 3-tert-Butyl-4-hydroxyanisole                                       | 38 |
|       |      | 1-(m-Dimethylaminophenyl)ethanol                                    | 30 |
|       |      | Ethylene, 1,1-diphenyl-                                             | 30 |
| 57.82 | 0.5  | Benzothiazol-2-amine, 6-methoxy-N-(4-methylbenzylideno)-            | 53 |
|       |      | Fluorene                                                            | 38 |
| 58.40 | 0.25 | Terephthalic acid, 3,5-difluorophenyl ethyl ester                   | 72 |
|       |      | Terephthalic acid, monochloride, ethyl ester                        | 64 |
|       |      | Terephthalic acid, 3-chlorophenylethyl ester                        | 59 |
| 58.53 | 0.39 | Diethyl Phthalate                                                   | 97 |
| 58.65 | 0.1  | 3,4-Altrosan                                                        | 30 |
|       |      | .beta.-D-Glucopyranose, 1,6-anhydro-                                | 30 |
| 58.99 | 0.93 | 1-Heneicosyl formate                                                | 98 |
|       |      | 3-Heptadecene, (Z)-                                                 | 97 |
|       |      | 8-Heptadecene                                                       | 95 |
| 59.08 | 0.51 | Heptadecane                                                         | 96 |
|       |      | Eicosane                                                            | 95 |
| 59.99 | 0.45 | Benzophenone                                                        | 93 |
|       |      | Bicyclo[3.2.1]octane-6-carboxylic acid, 2-oxo-, methyl ester, (6S)- | 91 |
| 60.25 | 0.2  | 1,4-Benzenedicarboxylic acid, diethyl ester                         | 89 |
|       |      | 2-(1-Cyclohexenyl)cyclohexanone                                     | 43 |
| 60.95 | 0.41 | Cyclopentane, 1-butyl-2-propyl-                                     | 53 |
|       |      | Cyclohexane, 1,2,4-trimethyl-                                       | 50 |
|       |      | 2,6,10-Dodecatrinal, 3,7,11-trimethyl-, (Z,E)-                      | 35 |
| 61.95 | 0.59 | [1,2,4]Triazolo[1,5-a]pyrazine                                      | 37 |
| 62.54 | 0.85 | 2(1H)-Pyridinone, 1-ethenyl-                                        | 45 |
|       |      | Dicyclopropylmethanol, pentafluoro propionate                       | 38 |
|       |      | Cyclopropanecarbonitrile                                            | 35 |
| 62.65 | 0.65 | 9-Tricosene, (Z)-                                                   | 99 |
|       |      | E-15-Heptadecenal                                                   | 98 |
| 62.67 | 0.67 | 5-Eicosene, (E)-                                                    | 99 |
|       |      | Cycloeicosane                                                       | 98 |
|       |      | 1-Octadecene                                                        | 98 |
| 62.74 | 0.52 | Octadecane                                                          | 89 |
|       |      | Eicosane                                                            | 86 |
| 63.07 | 1.03 | 1,5,9-Cyclododecatriene, 1,5,9-trimethyl-                           | 38 |
| 63.48 | 0.92 | 3-Hexenedinitrile                                                   | 81 |
|       |      | Spiro[bicyclo[2.2.1]hept-5-ene-2,1'-cyclopropane]                   | 53 |
| 64.31 | 4.13 | Pentanedinitrile, 2-methyl-                                         | 72 |
|       |      | 2-Pentenitrile                                                      | 47 |
| 65.57 | 2.72 | 2-Pentenitrile                                                      | 52 |
|       |      | 1,5-Cyclooctadiene, (E,Z)-                                          | 50 |
|       |      | Propargylamine                                                      | 47 |
| 66.16 | 1.78 | 9-Tricosene, (Z)-                                                   | 99 |
|       |      | 1-Nonadecene                                                        | 98 |

|       |      |                                                                        |    |
|-------|------|------------------------------------------------------------------------|----|
|       |      | Z-5-Nonadecene                                                         | 95 |
| 68.18 | 0.1  | Methyl 2-[1-(4-methylphenyl)hydrazino]propanoate                       | 47 |
|       |      | 3-Methyl-2,3-dihydro-benzo[b]thiophene-3-carboxylic acid, methyl ester | 30 |
| 68.32 | 1.14 | Butanenitrile, 2-methylene-                                            | 76 |
|       |      | Propanenitrile, 3-bromo-                                               | 50 |
|       |      | 2-Pentenitrile                                                         | 45 |
| 68.51 | 0.16 | 1H-Indole, 1-methyl-2-phenyl-                                          | 35 |
| 69.66 | 1.9  | 9-Tricosene, (Z)-                                                      | 99 |
|       |      | 13-Tetradecen-1-ol acetate                                             | 93 |
| 71.44 | 0.44 | n-Hexadecanoic acid                                                    | 42 |
|       |      | 2-(Acetoxymethyl)-3-(methoxycarbonyl)biphenylene                       | 35 |
| 73.99 | 1.78 | Octacosyl trifluoroacetate                                             | 91 |
|       |      | Hexadecane, 1-(ethenyloxy)-                                            | 89 |
|       |      | 9-Tricosene, (Z)-                                                      | 87 |
| 79.51 | 1.84 | 1-Nonadecene                                                           | 92 |
|       |      | 9-Tricosene, (Z)-                                                      | 90 |
|       |      | Pyridine-3-carboxamide, oxime, N-(2-trifluoromethylphenyl)-            | 90 |
| 82.16 | 0.31 | 9-Tricosene, (Z)-                                                      | 43 |
| 82.37 | 1.13 | Hexatriacontyl pentafluoropropionate                                   | 70 |
|       |      | Tetratriacontyl pentafluoropropionate                                  | 70 |
|       |      | Octatriacontyl pentafluoropropionate                                   | 70 |
| 82.41 | 0.26 | 9-Tricosene, (Z)-                                                      | 95 |
|       |      | 11-Tricosene                                                           | 93 |
| 82.47 | 0.88 | Tetratriacontyl heptafluorobutyrate                                    | 64 |
|       |      | Tetratriacontyl trifluoroacetate                                       | 64 |
|       |      | Dotriacontyl trifluoroacetate                                          | 64 |
| 82.53 | 0.38 | Hexadecane, 1-(ethenyloxy)-                                            | 93 |
|       |      | 1-Decanol, 2-hexyl-                                                    | 92 |
|       |      | Cyclopentadecane                                                       | 91 |
| 82.58 | 0.45 | Ethanol, 2-(tetradecyloxy)-                                            | 83 |
|       |      | 1-Hentetracontanol                                                     | 81 |
|       |      | Tetratriacontyl heptafluorobutyrate                                    | 76 |
| 82.64 | 1.37 | 13-Tetradecen-1-ol acetate                                             | 83 |
|       |      | Behenyl chloride                                                       | 80 |
|       |      | 1-Tricosene                                                            | 70 |
| 84.16 | 0.97 | N-Benzoylglycine ethyl ester                                           | 58 |
|       |      | S-Benzoyl-N-(p-methoxybenzylidene) thiohydroxylamine                   | 50 |
|       |      | Hydrazinecarboxylic acid, 2-benzoyl-, ethyl ester                      | 47 |
| 86.67 | 0.84 | 9-Tricosene, (Z)-                                                      | 96 |
| 86.70 | 0.15 | 9-Tricosene, (Z)-                                                      | 93 |
|       |      | Octatriacontyl pentafluoropropionate                                   | 50 |
|       |      | Decane, 5,6-bis(2,2-dimethylpropylidene)-, (Z,Z)-                      | 46 |
| 86.72 | 0.64 | 1-Tricosene                                                            | 94 |
|       |      | Eicosane                                                               | 91 |
|       |      | Cyclohexadecane                                                        | 84 |
| 95.95 | 0.19 | Hexahydropyridine, 1-methyl-4-[4,5-dihydroxyphenyl]-                   | 43 |

|        |      |                                                      |    |
|--------|------|------------------------------------------------------|----|
|        |      | Cyclotrisiloxane, hexamethyl-                        | 27 |
|        |      | Acetamide, N-(4-bromo-2-chlorophenyl)-               | 25 |
| 96.13  | 1.92 | 9-Tricosene, (Z)-                                    | 72 |
|        |      | 1-Nonadecene                                         | 70 |
|        |      | 1-Decanol, 2-hexyl-                                  | 55 |
| 102.15 | 0.18 | 4-Cyanobenzophenone                                  | 35 |
| 102.18 | 0.02 | 1H-Indole, 1-methyl-2-phenyl-                        | 35 |
| 108.61 | 0.38 | 1H-Indole, 5-methyl-2-phenyl-                        | 35 |
| 108.66 | 0.11 | 9-Tricosene, (Z)-                                    | 90 |
|        |      | (+)-cis-3,4-Dimethyl-2-phenyltetrahydro-1,4-thiazine | 38 |
| 111.83 | 0.34 | 1-Nonadecene                                         | 92 |
|        |      | 9-Tricosene, (Z)-                                    | 91 |
|        |      | 17-Pentatriacontene                                  | 87 |
| 111.98 | 0.24 | 9-Tricosene, (Z)-                                    | 74 |
|        |      | Tetratriacontyl pentafluoropropionate                | 50 |
|        |      | Tetratriacontyl heptafluorobutyrate                  | 50 |
| 112.01 | 0.04 | 9-Tricosene, (Z)-                                    | 86 |
|        |      | Oxalic acid, hexadecyl propyl ester                  | 45 |
| 112.05 | 0.07 | Octatriacontyl pentafluoropropionate                 | 50 |
|        |      | Hexatriacontyl pentafluoropropionate                 | 45 |
|        |      | Octacosyl trifluoroacetate                           | 42 |
| 112.07 | 0.04 | Oxalic acid, hexadecyl propyl ester                  | 41 |
|        |      | Eicosane                                             | 38 |
|        |      | 2-Thiopheneacetic acid, 6-ethyl-3-octyl ester        | 35 |
|        | 0.9  | Others                                               |    |



**Table S4. CS-F1@650 composition**

| RT     | Area% | Library/ID                                   | Qual |
|--------|-------|----------------------------------------------|------|
| 6.984  | 1.53  | Ethyl Acetate                                | 86   |
| 9.293  | 1.81  | Acetic acid                                  | 90   |
| 11.175 | 2.21  | 2-Propanone, 1-hydroxy-                      | 45   |
| 26.345 | 1.04  | Cyclohexanone                                | 83   |
|        |       | 2-Cyclopenten-1-one, 2-hydroxy-              | 80   |
|        |       | .alpha.-Pyrrolidone, N-methyl-5-bromomethyl- | 72   |
| 27.920 | 0.17  | 2(5H)-Furanone                               | 86   |
|        |       | Formamide, N-(cyanomethyl)-                  | 43   |
| 27.935 | 0.27  | 2(5H)-Furanone                               | 80   |
|        |       | 2H-Pyran, 3,4-dihydro-                       | 42   |
| 29.963 | 0.35  | 2,4-Diaminopyrimidine                        | 64   |
|        |       | Resorcinol                                   | 58   |
|        |       | 2-Amino-3-hydroxypyridine                    | 53   |
| 32.055 | 0.99  | 2-Cyclopenten-1-one, 2-hydroxy-3-methyl-     | 94   |
| 32.452 | 0.42  | Phenol                                       | 91   |
| 33.828 | 0.08  | Acetophenone                                 | 87   |
| 34.907 | 0.26  | l-Alanine, N-valeryl-, tetradecylester       | 45   |
|        |       | 3-tert-Butyl-2-oxo-1,3-oxazolidine           | 43   |
|        |       | Oxalic acid, 4-chlorophenyl undecyl ester    | 43   |
| 35.466 | 0.34  | p-Cresol                                     | 93   |
|        |       | Phenol, 2-methyl-                            | 93   |
|        |       | Phenol, 3-methyl-                            | 93   |
| 36.549 | 0.21  | 1-Butanone, 1-phenyl-                        | 49   |
|        |       | Isopropyl phenyl ketone                      | 49   |
|        |       | 1,2-Propanedione, 1-phenyl-                  | 47   |
| 36.613 | 0.43  | Borinic acid, diethyl-, methyl ester         | 50   |
|        |       | Tetrahydrofurfuryl chloride                  | 49   |
|        |       | Hexanoic acid, 2-tetrahydrofurylmethyl ester | 40   |
| 36.830 | 0.37  | Maltol                                       | 53   |
|        |       | 4,5-Diamino-6-hydroxypyrimidine              | 50   |
| 36.928 | 1.07  | p-Cresol                                     | 94   |
| 37.201 | 0.63  | Cyclododecane                                | 95   |
|        |       | 1-Dodecene                                   | 93   |
| 37.430 | 0.38  | Dodecane                                     | 95   |
|        |       | Tetradecane                                  | 74   |
|        |       | Pentadecane                                  | 72   |
| 38.086 | 0.99  | Propanamide, N-methyl-2-amino-               | 45   |
|        |       | 2-Formylhistamine                            | 38   |
| 40.448 | 0.41  | Benzene, 1,2-dimethoxy-                      | 70   |
|        |       | 1,3-Benzenediamine, 4-methoxy-               | 58   |
|        |       | Benzene, 1,4-dimethoxy-                      | 58   |
| 41.355 | 15.62 | Benzoic acid                                 | 96   |
| 41.928 | 0.8   | E,Z-2,13-Octadecadien-1-ol                   | 92   |
|        |       | Benzoic acid                                 | 60   |

|        |      |                                                                            |    |
|--------|------|----------------------------------------------------------------------------|----|
| 42.097 | 1.07 | 1-Tridecene                                                                | 97 |
|        |      | 2-Tetradecene, (E)-                                                        | 83 |
| 42.285 | 0.53 | Tridecane                                                                  | 95 |
|        |      | Bacchotricuneatin c                                                        | 59 |
| 42.926 | 1.08 | 2,2-Dimethyl-3-heptene trans                                               | 38 |
|        |      | Cyclohexane, 1,1,2-trimethyl-                                              | 38 |
| 43.330 | 0.51 | 8-Decen-2-one, 9-methyl-5-methylene                                        | 30 |
| 43.739 | 1.52 | 2-Acetylcyclopentanone                                                     | 38 |
|        |      | Cyanamide, dibutyl-                                                        | 38 |
| 44.811 | 0.26 | Naphthalene, 1-methyl-                                                     | 62 |
| 45.677 | 0.45 | 2-Furanacetic acid, .alpha.-hydroxy                                        | 30 |
| 45.823 | 1.15 | Caprolactam                                                                | 81 |
| 46.052 | 0.46 | Benzoic acid, 4-methyl-                                                    | 93 |
| 46.427 | 0.14 | Bicyclo[3.1.1]heptan-3-one, 2,6,6-trimethyl-, (1.alpha.,2.beta.,5.alpha.)- | 35 |
|        |      | Triallylsilane                                                             | 35 |
|        |      | Cyclohexanone, 2-(1-mercapto-1-methylethyl)-5-methyl-, trans-              | 35 |
| 46.449 | 0.13 | Bicyclo[3.1.1]heptan-3-one, 2,6,6-trimethyl-, (1.alpha.,2.beta.,5.alpha.)- | 46 |
|        |      | Trichloroacetic acid, undec-10-enyl ester                                  | 43 |
|        |      | 9-Undecenol, 2,10-dimethyl-                                                | 35 |
| 46.689 | 1.66 | 1-Tetradecene                                                              | 99 |
| 46.850 | 0.71 | Tetradecane                                                                | 98 |
|        |      | Pentadecane                                                                | 87 |
| 48.459 | 2.29 | Biphenyl                                                                   | 94 |
| 48.860 | 0.37 | Ninhydrin                                                                  | 53 |
|        |      | 3-Pyridinecarbonitrile                                                     | 49 |
|        |      | Phthalic anhydride                                                         | 46 |
| 50.232 | 1.04 | Methanol, oxo-, benzoate                                                   | 91 |
|        |      | 2-Chloroethyl benzoate                                                     | 80 |
|        |      | Benzoic acid, silver(1+) salt                                              | 72 |
| 50.655 | 0.6  | 1,1'-Biphenyl, 2-methyl-                                                   | 87 |
|        |      | Diphenylmethane                                                            | 87 |
| 50.888 | 0.39 | 1,12-Tridecadiene                                                          | 89 |
|        |      | Eicosen-1-ol, cis-9-                                                       | 83 |
|        |      | Ethanol, 2-(9-octadecenyl-oxo)-, (Z)-                                      | 83 |
| 51.019 | 1.94 | 1-Pentadecene                                                              | 99 |
| 51.158 | 0.86 | Pentadecane                                                                | 96 |
| 52.548 | 1    | Cyclohexane, 1,2,4-trimethyl-                                              | 38 |
|        |      | Cyclohexane, 1-ethyl-2-propyl-                                             | 30 |
|        |      | 9-Tricosene, (Z)-                                                          | 30 |
| 52.979 | 0.41 | Naphthalene, 1-(2-propenyl)-                                               | 70 |
|        |      | 1,1'-Biphenyl, 2-methyl-                                                   | 62 |
| 53.429 | 0.29 | 1,1'-Biphenyl, 3-methyl-                                                   | 91 |
|        |      | 1,1'-Biphenyl, 4-methyl-                                                   | 87 |
| 53.527 | 0.3  | Butylated Hydroxytoluene                                                   | 91 |
|        |      | Phenol, 2,4,6-tris(1-methylethyl)-                                         | 90 |
| 55.000 | 0.38 | Z,E-2,13-Octadecadien-1-ol                                                 | 81 |

|        |      |                                                                          |    |
|--------|------|--------------------------------------------------------------------------|----|
|        |      | cis-7-Tetradecen-1-ol                                                    | 74 |
|        |      | 11-Hexadecen-1-ol, acetate, (Z)-                                         | 70 |
| 55.109 | 1.74 | Cetene                                                                   | 98 |
| 55.225 | 0.81 | Hexadecane                                                               | 98 |
|        |      | Tridecane, 1-iodo-                                                       | 94 |
| 55.679 | 0.46 | Cyclohexane, 1,1,3,5-tetramethyl-,trans-                                 | 41 |
|        |      | 2,2-Dimethyl-3-heptene trans                                             | 38 |
|        |      | Cyclopropanol, 1-(3,7-dimethyl-1-octenyl)-                               | 38 |
| 56.582 | 0.34 | 4-Methyl-2,6-dihydroxyquinoline                                          | 47 |
|        |      | 7-Amino-4-methyl-1,8-naphthyridin-2-ol                                   | 47 |
| 57.808 | 0.71 | Fluorene                                                                 | 94 |
| 58.378 | 0.32 | Terephthalic acid, but-3-enyl ethyl ester                                | 78 |
|        |      | Terephthalic acid, 2-chlorophenylethyl ester                             | 59 |
|        |      | Terephthalic acid, ethyl 2-methylphenyl ester                            | 59 |
| 58.539 | 0.02 | Diethyl Phthalate                                                        | 87 |
| 58.884 | 0.26 | 1,11-Dodecadiene                                                         | 90 |
|        |      | 1-Cyclohexylnonene                                                       | 90 |
|        |      | 1,19-Eicosadiene                                                         | 74 |
| 58.974 | 1.75 | 3-Heptadecene, (Z)-                                                      | 99 |
|        |      | E-14-Hexadecenal                                                         | 99 |
|        |      | 8-Heptadecene                                                            | 98 |
| 59.075 | 0.79 | Heptadecane                                                              | 97 |
| 59.686 | 0.7  | Benzene, 1,1'-(1,3-propanediyl)bis                                       | 93 |
| 59.974 | 0.6  | Benzophenone                                                             | 94 |
| 60.263 | 0.12 | Benzaldehyde, 4,6-dimethoxy-2,3-dimethyl-                                | 49 |
|        |      | Anthracene, 9-ethyl-9,10-dihydro-10-methyl-                              | 35 |
| 60.953 | 0.71 | 1-Heptadecene                                                            | 58 |
|        |      | Pyridine-3-carboxamide, oxime, N-(2-trifluoromethylphenyl)-              | 56 |
|        |      | Cyclohexane, 1,2,4-trimethyl-                                            | 50 |
| 61.976 | 0.62 | 5-Methyl-Z-5-docosene                                                    | 74 |
|        |      | 11-Tricosene                                                             | 46 |
|        |      | 9-Tricosene, (Z)-                                                        | 41 |
| 62.231 | 3.27 | Benzene, (3-nitropropyl)-                                                | 27 |
|        |      | 1-Benzyl-1,2,3-triazole                                                  | 27 |
|        |      | N-Benzyl-1H-benzimidazole                                                | 27 |
| 62.482 | 0.3  | cis-Stilbene                                                             | 90 |
|        |      | Stilbene                                                                 | 56 |
|        |      | Ethylene, 1,1-diphenyl-                                                  | 50 |
| 62.658 | 3.55 | E-15-Heptadecenal                                                        | 99 |
|        |      | 1-Octadecene                                                             | 98 |
| 62.887 | 0.46 | 1,1-Diphenylcyclopropane                                                 | 97 |
| 63.161 | 0.35 | 1-Cyclohexyl-1-(4-methylcyclohexyl)ethane                                | 53 |
|        |      | Cyclohexane, 1-ethyl-2-propyl-                                           | 43 |
|        |      | Bicyclo[3.1.1]heptan-3-one, 2-(2,2-D292)-6,6-dimethyl-, (stereoisomer 2) | 41 |
| 63.794 | 0.49 | (2,4,6-Trimethylcyclohexyl) methanol                                     | 43 |
|        |      | Cyclohexane, 1,1,3,5-tetramethyl-,cis-                                   | 43 |

|         |      |                                                                                  |    |
|---------|------|----------------------------------------------------------------------------------|----|
|         |      | Cyclohexanone, 2-(1-mercapto-1-methylethyl)-5-methyl-, trans-                    | 38 |
| 64.870  | 0.41 | 9H-Fluoren-9-one                                                                 | 90 |
| 65.106  | 0.49 | Benzene, 1,1'-(1,2-dimethyl-1,2-ethenediyl)bis-, (Z)-                            | 55 |
|         |      | Benzene, 1,1'-(1,2-dimethyl-1,2-ethenediyl)bis-, (E)-                            | 55 |
|         |      | 5,6-Dimethyl-1,10-phenanthroline                                                 | 51 |
| 66.152  | 3.62 | 1-Nonadecene                                                                     | 99 |
|         |      | 3-Heptadecene, (Z)-                                                              | 97 |
|         |      | Z-5-Nonadecene                                                                   | 95 |
| 68.263  | 0.5  | 7-(Butanoylamino)-4-chloro-3-(propyloxy)-1H-2-benzopyran-1-one                   | 46 |
|         |      | 4-Isothiazolol, 5-chloro-3-phenyl-                                               | 30 |
|         |      | 4,7-Dichloro-3-methylquinoline                                                   | 30 |
| 68.353  | 0.2  | 1H-Indene, 3-methyl-                                                             | 35 |
|         |      | 2-(Acetoxymethyl)-3-(methoxycarbonyl)biphenylene                                 | 35 |
|         |      | 2,5-Diphenyl-1,5-hexadiene                                                       | 25 |
| 68.506  | 0.47 | 2-Oxabicyclo[4.4.0]dec-9-en-8-one, 1,3,7,7-tetramethyl-, (-)-(1R,3S,6R)-         | 20 |
| 69.462  | 0.34 | Cyclohexane, 1-(cyclohexylmethyl)-4-ethyl-, trans-                               | 42 |
| 69.668  | 3.12 | 9-Tricosene, (Z)-                                                                | 99 |
|         |      | 5-Eicosene, (E)-                                                                 | 97 |
| 69.905  | 0.43 | Isophthalic acid, 2-chloroethyl ethyl ester                                      | 66 |
| 71.640  | 0.69 | 1,3-Dioxolane, 4-ethyl-5-octyl-2,2-bis(trifluoromethyl)-, trans-                 | 70 |
|         |      | 1-Cyclohexyl-1-(4-methylcyclohexyl)ethane                                        | 38 |
|         |      | Cyclopentane, 1-pentyl-2-propyl-                                                 | 35 |
| 73.972  | 2.94 | 11-Tricosene                                                                     | 98 |
|         |      | 9-Tricosene, (Z)-                                                                | 91 |
|         |      | 1-Heneicosanol                                                                   | 91 |
| 79.490  | 3.01 | 1-Nonadecene                                                                     | 96 |
|         |      | 9-Tricosene, (Z)-                                                                | 95 |
| 84.153  | 1.35 | 1,3-Propanediol dibenzoate                                                       | 55 |
|         |      | 1H-Indol-2-one, 2,3-dihydro-1-methyl-3,2'-spiro-(5-methyl-5-phenyl-1,3-dioxane)- | 50 |
|         |      | N-Benzoylglycine ethyl ester                                                     | 49 |
| 86.425  | 0.08 | 9-Tricosene, (Z)-                                                                | 89 |
|         |      | Cyclohexane, 1,2-dimethyl-3-pentyl-4-propyl-                                     | 64 |
| 86.676  | 3.5  | Cyclotetracosane                                                                 | 92 |
|         |      | 1-Tricosene                                                                      | 86 |
|         |      | 9-Tricosene, (Z)-                                                                | 83 |
| 96.018  | 0.68 | Cyclotetracosane                                                                 | 83 |
|         |      | 9-Tricosene, (Z)-                                                                | 78 |
|         |      | 1-Tricosene                                                                      | 64 |
| 96.115  | 1.17 | 1-Tricosene                                                                      | 95 |
|         |      | 1-Decanol, 2-hexyl-                                                              | 91 |
|         |      | 9-Tricosene, (Z)-                                                                | 89 |
| 96.168  | 1.2  | 9-Tricosene, (Z)-                                                                | 95 |
|         |      | 11-Tricosene                                                                     | 92 |
|         |      | Tetracosyl heptafluorobutyrate                                                   | 89 |
| 108.546 | 0.34 | 9-Tricosene, (Z)-                                                                | 72 |
| 108.602 | 0.17 | Fumaric acid, pent-4-en-2-yl tridecyl ester                                      | 38 |

|         |      |                                                          |    |
|---------|------|----------------------------------------------------------|----|
| 108.632 | 0.12 | 9-Tricosene, (Z)-                                        | 90 |
| 110.701 | 1.48 | (2,3-Diphenylcyclopropyl)methyl phenyl sulfoxide, trans- | 50 |
| 110.746 | 0.58 | 1-benzylindole                                           | 38 |
|         |      | Azetidine, 1-benzyl-3,3-dimethyl-2-phenyl-               | 32 |
| 110.768 | 0.49 | 1-benzylindole                                           | 38 |
|         |      | Azetidine, 1-benzyl-3,3-dimethyl-2-phenyl-               | 32 |
| 110.806 | 2.91 | 1-benzylindole                                           | 23 |

| Table S5. CS-F2@650 composition |       |                                                      |      |
|---------------------------------|-------|------------------------------------------------------|------|
| RT                              | Area% | Library/ID                                           | Qual |
| 6.586                           | 0.08  | Acetic acid, chloro-, isobutyl ester                 | 50   |
|                                 |       | Cyclopentane, methyl-                                | 43   |
|                                 |       | 1-Pentene, 2-methyl-                                 | 43   |
| 6.987                           | 0.58  | Ethyl Acetate                                        | 90   |
| 9.3                             | 2.42  | Acetic acid                                          | 90   |
| 11.178                          | 2     | 2-Propanone, 1-hydroxy-                              | 59   |
| 14.335                          | 0.14  | Toluene                                              | 90   |
| 14.458                          | 0.16  | Propanoic acid                                       | 90   |
| 17.465                          | 0.22  | Cyclopentanone                                       | 90   |
| 17.731                          | 0.8   | 2,4-Dimethyl-1-heptene                               | 96   |
|                                 |       | 2-Hexene, 3,5-dimethyl-                              | 59   |
| 19.489                          | 0.1   | Pentanoic acid                                       | 42   |
|                                 |       | Butanoic acid, 4-chloro-                             | 39   |
|                                 |       | Hexanoic acid                                        | 39   |
| 19.95                           | 0.25  | Ethylbenzene                                         | 91   |
|                                 |       | o-Xylene                                             | 87   |
| 20.61                           | 0.65  | Furfural                                             | 87   |
|                                 |       | 3(2H)-Pyridazinone                                   | 64   |
| 22.087                          | 5.31  | Styrene                                              | 97   |
|                                 |       | Bicyclo[4.2.0]octa-1,3,5-triene                      | 97   |
|                                 |       | Styrene                                              | 96   |
| 22.675                          | 0.11  | 2-Furanmethanol                                      | 94   |
| 23.084                          | 0.28  | 2-Propanone, 1-(acetyloxy)-                          | 47   |
|                                 |       | 2-Butanone, 3-methyl-                                | 43   |
|                                 |       | 2,3-Butanedione                                      | 43   |
| 24.46                           | 0.15  | 2-Cyclopenten-1-one, 2-methyl-                       | 91   |
| 25.015                          | 0.24  | Ethanone, 1-(2-furanyl)-                             | 68   |
| 26.353                          | 0.97  | 2-Cyclopenten-1-one, 2-hydroxy-                      | 86   |
|                                 |       | Cyclopentanone, 2-methyl-                            | 72   |
|                                 |       | 1,3-Cyclopentanedione                                | 72   |
| 26.439                          | 0.51  | 1-Decene                                             | 91   |
|                                 |       | Cyclobutane, 1-butyl-2-ethyl-                        | 72   |
| 26.75                           | 0.38  | Decane                                               | 58   |
| 27.241                          | 0.53  | .alpha.-Methylstyrene                                | 93   |
| 27.706                          | 0.41  | Benzaldehyde                                         | 96   |
| 27.935                          | 0.52  | 2(5H)-Furanone                                       | 86   |
|                                 |       | 2-Butenal, 2-methyl-                                 | 47   |
| 28.426                          | 0.68  | 2-Furancarboxaldehyde, 5-methyl-                     | 95   |
| 29.082                          | 0.27  | 2-Cyclopenten-1-one, 3-methyl-                       | 96   |
| 29.775                          | 0.33  | Benzonitrile                                         | 94   |
|                                 |       | 2-Ethynyl pyridine                                   | 91   |
| 29.951                          | 0.49  | 1H-Imidazole-2-carboxaldehyde, 1-methyl-             | 59   |
|                                 |       | Imidazole, 1,4,5-trimethyl-                          | 53   |
|                                 |       | Hydroquinone                                         | 50   |
| 30.581                          | 0.1   | Oxazolidine, 2-butyl-2-ethyl-3-methyl-               | 72   |
|                                 |       | Oxazolidine, 2,2-diethyl-3-methyl-                   | 50   |
|                                 |       | Propanamide, N-(2,6-dimethylphenyl)-3-(4-morpholyl)- | 47   |
| 31.016                          | 0.16  | But-3-en-1-ynyl methyl sulfide                       | 53   |
|                                 |       | 4-Methyl-5H-furan-2-one                              | 49   |
|                                 |       | 2-Pentenal, 2-methyl-                                | 46   |
| 31.376                          | 0.12  | Indene                                               | 70   |
|                                 |       | Benzene, 1-propynyl-                                 | 64   |
| 31.477                          | 0.44  | 3-Eicosene, (E)-                                     | 64   |
|                                 |       | Cyclopentane, propyl-                                | 62   |
|                                 |       | Ethanone, 1-cyclopentyl-                             | 53   |

|        |      |                                                                                           |    |
|--------|------|-------------------------------------------------------------------------------------------|----|
| 31.702 | 0.37 | 4-Isopropyl-1,3-cyclohexanedione                                                          | 64 |
|        |      | 5-Ethyl-1-nonene                                                                          | 52 |
|        |      | Cyclooctane                                                                               | 38 |
| 32.024 | 1.32 | 3-Octene, (Z)-                                                                            | 80 |
|        |      | 1,2-Cyclopentanedione, 3-methyl-                                                          | 70 |
|        |      | 2-Cyclopenten-1-one, 2-hydroxy-3-methyl-                                                  | 62 |
| 32.238 | 0.34 | Undecane                                                                                  | 95 |
| 32.452 | 0.5  | Phenol                                                                                    | 94 |
| 32.636 | 0.15 | 6-Methyl-3-heptyne                                                                        | 76 |
|        |      | 2-Cyclopenten-1-one, 2,3-dimethyl-                                                        | 72 |
|        |      | Cyclooctene                                                                               | 58 |
| 33.831 | 0.62 | Acetophenone                                                                              | 94 |
| 34.067 | 0.17 | 3-Hexene, 2,2,5,5-tetramethyl-, (Z)-                                                      | 38 |
| 34.559 | 0.19 | Benzoic acid, methyl ester                                                                | 87 |
| 34.9   | 0.43 | 2,4,5-Trihydroxypyrimidine                                                                | 38 |
|        |      | Butanal                                                                                   | 35 |
| 35.143 | 0.54 | Phenol, 2-methoxy-                                                                        | 93 |
| 35.462 | 0.49 | Phenol, 2-methyl-                                                                         | 96 |
|        |      | p-Cresol                                                                                  | 95 |
| 35.698 | 0.22 | 1H-Imidazole-4-carboxylic acid, methyl ester                                              | 64 |
|        |      | Furyl hydroxymethyl ketone                                                                | 64 |
|        |      | Methyl 2-furoate                                                                          | 64 |
| 35.927 | 0.34 | Benzene, (1-methylenebutyl)-                                                              | 53 |
|        |      | 2,3-Pyrazinedicarbonitrile, 5-amino-6-[(2,3-dihydro-3-hydroxy-2-oxo-1H-indol-3-yl)amino]- | 38 |
|        |      | .alpha.-Methylstyrene                                                                     | 38 |
| 36.534 | 1.41 | Isopropyl phenyl ketone                                                                   | 80 |
|        |      | 1,2-Propanedione, 1-phenyl-                                                               | 76 |
|        |      | Phenacyl thiocyanate                                                                      | 72 |
| 36.808 | 0.38 | Maltol                                                                                    | 94 |
| 36.931 | 0.89 | Phenol, 3-methyl-                                                                         | 95 |
|        |      | p-Cresol                                                                                  | 93 |
| 37.201 | 0.8  | 1-Dodecene                                                                                | 97 |
| 37.426 | 0.54 | Cyclododecane                                                                             | 94 |
|        |      | Dodecane                                                                                  | 94 |
| 38.086 | 0.54 | Glutaraldehyde                                                                            | 42 |
|        |      | Cyclopropyl carbinol                                                                      | 42 |
|        |      | 2-Butanamine, 3-methyl-                                                                   | 42 |
| 38.213 | 0.26 | 2-Hexynoic acid                                                                           | 60 |
|        |      | 2H-Pyran-2-one                                                                            | 55 |
| 38.412 | 0.5  | Benzoic acid, ethyl ester                                                                 | 94 |
| 38.783 | 0.12 | 1-Propanone, 1-phenyl-                                                                    | 64 |
|        |      | N(N'-Methyl-N'-nitroso(aminomethyl))benzamide                                             | 64 |
|        |      | 1-Propanone, 1-phenyl-                                                                    | 64 |
| 39.387 | 0.22 | Naphthalene                                                                               | 93 |
| 39.807 | 0.18 | Phenol, 3,5-dimethyl-                                                                     | 81 |
|        |      | Phenol, 2,3-dimethyl-                                                                     | 81 |
| 40.122 | 0.11 | Ethanone, 1-(4-methylphenyl)-                                                             | 49 |
|        |      | o-Cymene                                                                                  | 46 |
|        |      | Benzene, 1-methyl-3-(1-methylethyl)-                                                      | 46 |
| 40.316 | 0.13 | 4H-Pyran-4-one, 3,5-dihydroxy-2-methyl-                                                   | 92 |
|        |      | 5-Hydroxy-2-methylthiopyrimidine                                                          | 53 |
| 40.444 | 0.47 | Creosol                                                                                   | 98 |
|        |      | 2-Methoxy-5-methylphenol                                                                  | 93 |
| 41.404 | 9.38 | Benzoic acid                                                                              | 96 |
| 41.621 | 0.03 | Benzoic acid                                                                              | 93 |
| 41.643 | 0.06 | Benzoic acid                                                                              | 96 |
| 41.932 | 0.24 | Benzoic acid                                                                              | 60 |
|        |      | 1,12-Tridecadiene                                                                         | 46 |

|        |      |                                                                                  |           |
|--------|------|----------------------------------------------------------------------------------|-----------|
|        |      | Z-12-Tetradecen-1-ol                                                             | 46        |
| 42.09  | 0.75 | 1-Tridecene                                                                      | 99        |
|        |      | 1-Pentadecene                                                                    | 93        |
| 42.285 | 0.4  | Tridecane                                                                        | 95        |
| 42.926 | 1.49 | Cyclohexane, 1,2,3-trimethyl-, (1.alpha.,2.beta.,3.alpha.)-                      | 43        |
|        |      | Nonane, 2-methyl-3-methylene-                                                    | 43        |
| 43.319 | 0.52 | 11-Methyldodecanol                                                               | 52        |
|        |      | 2-Undecanethiol, 2-methyl-                                                       | 50        |
|        |      | Cyclopentane, (2-methylbutyl)-                                                   | 43        |
| 43.728 | 1.87 | Cyclohexane, 1,1-dimethyl-2-propyl                                               | 52        |
|        |      | Cyanamide, dibutyl-                                                              | 41        |
|        |      | 1-Hexene, 3,3-dimethyl-                                                          | 38        |
| 44.567 | 0.16 | 5-Isopropyl-3,3-dimethyl-2-methylene-2,3-dihydrofuran                            | 76        |
|        |      | Phenol, 4-ethyl-2-methoxy-                                                       | 70        |
|        |      | O-Methoxy-.alpha.-methylbenzyl alcohol                                           | 58        |
| 44.819 | 0.24 | Naphthalene, 1-methyl-                                                           | 70        |
|        |      | Naphthalene, 2-methyl-                                                           | 70        |
| 45.01  | 0.18 | Cyclobutane, 1-butyl-2-ethyl-                                                    | 49        |
|        |      | Citral                                                                           | 43        |
|        |      | 2-Undecene, 7-methyl-                                                            | 38        |
| 45.418 | 0.14 | Valeric acid, 4-pentadecyl ester                                                 | 35        |
| 45.67  | 1.26 | 5-Hydroxymethylfurfural                                                          | 86        |
|        |      | 2-Furancarboxylic acid, 5-(hydroxymethyl)-                                       | 38        |
| 45.842 | 1.19 | Caprolactam                                                                      | 94        |
| 46.059 | 0.4  | Benzoic acid, 4-methyl-                                                          | 94        |
|        |      | Benzoic acid, 3-methyl-                                                          | 81        |
| 46.438 | 0.24 | 7-Tetradecene, (E)-                                                              | 38        |
|        |      | (2,4,6-Trimethylcyclohexyl) methanol                                             | 38        |
| 46.532 | 0.18 | 1,11-Dodecadiene                                                                 | 95        |
|        |      | 1,12-Tridecadiene                                                                | 89        |
|        |      | Cyclopropaneoctanoic acid, 2-[(2-pentylcyclopropyl)methyl]-, methylester         | 87        |
| 46.689 | 1.02 | 2-Tetradecene, (E)-                                                              | 97        |
|        |      | 1-Tetradecene                                                                    | 96        |
| 46.847 | 0.41 | <b>Tetradecane</b>                                                               | <b>98</b> |
|        |      | Hexacosane                                                                       | 90        |
| 47.21  | 0.19 | 4-Ethylbenzoic acid, 2-bromo-4-fluorophenyl ester                                | 58        |
|        |      | 4-Ethylbenzoic acid, 2,5-dichlorophenyl ester                                    | 53        |
|        |      | 1-Propanone, 1-(2,4-dimethylphenyl)-2-methyl-                                    | 53        |
| 48.166 | 0.16 | Benzoic acid, 2-(1-methylethyl)-                                                 | 64        |
|        |      | 1-Penten-3-one, 4-methyl-1-phenyl-                                               | 55        |
|        |      | Propanedioic acid, nitrile, hydrazide, N2-(1-oxo-3-phenyl-2-propenyl)-           | 49        |
| 48.455 | 1.67 | <b>Biphenyl</b>                                                                  | <b>94</b> |
| 48.863 | 0.42 | Indan-1,2,3-trione                                                               | 72        |
|        |      | 1,2-Benzenedicarboxylic acid                                                     | 64        |
|        |      | [2,2'-Bi-1H-indene]-1,1'-dione, 2,2',3,3'-tetrahydro-2,2',3,3,3',3'-hexahydroxy- | 64        |
| 50.22  | 0.84 | 2-Chloroethyl benzoate                                                           | 93        |
|        |      | Benzoic acid, ethyl ester                                                        | 70        |
| 50.509 | 0.06 | 3-Chloro-4-methoxytoluene                                                        | 35        |
| 50.644 | 0.21 | Diphenylmethane                                                                  | 89        |
| 50.88  | 0.13 | 1,13-Tetradecadiene                                                              | 97        |
|        |      | 9-Octadecen-1-ol, (Z)-                                                           | 95        |
| 51.015 | 0.89 | 1-Pentadecene                                                                    | 99        |
| 51.154 | 0.44 | Pentadecane                                                                      | 98        |
| 52.016 | 0.15 | Vanillin                                                                         | 42        |
| 52.316 | 0.1  | Ethyl 4-cyanobenzoate                                                            | 64        |
|        |      | Benzoic acid, 4-cyano-                                                           | 43        |
| 52.56  | 0.89 | n-Propyl benzoate                                                                | 38        |
|        |      | Acetophenone, 2-chloro-                                                          | 35        |



|        |      |                                                                            |    |
|--------|------|----------------------------------------------------------------------------|----|
| 52.968 | 0.17 | 1,1'-Biphenyl, 3-methyl-                                                   | 70 |
|        |      | 1,1'-Biphenyl, 2-methyl-                                                   | 64 |
| 52.994 | 0.09 | 1,1'-Biphenyl, 2-methyl-                                                   | 96 |
|        |      | 1,1'-Biphenyl, 4-methyl-                                                   | 93 |
| 53.418 | 0.21 | 1,1'-Biphenyl, 2-methyl-                                                   | 96 |
|        |      | Diphenylmethane                                                            | 93 |
| 53.665 | 0.21 | Cyclopentane, 1-butyl-2-pentyl-                                            | 49 |
|        |      | Cyclohexane, 1,1,2-trimethyl-                                              | 46 |
|        |      | Tricosyl trifluoroacetate                                                  | 46 |
| 54.085 | 0.23 | 1-Hexadecanethiol                                                          | 50 |
|        |      | 1H-Imidazole, 2-ethyl-4,5-dihydro-4-methyl-                                | 41 |
|        |      | Cyclohexane, 1,1,2-trimethyl-                                              | 38 |
| 54.333 | 0.14 | Phosphetane, 1-chloro-2,2,3,4,4-pentamethyl-, 1-oxide                      | 42 |
| 54.546 | 0.2  | Bibenzyl                                                                   | 53 |
|        |      | Acetic acid, [(phenylmethyl)thio]-                                         | 49 |
| 54.992 | 0.27 | 1,9-Tetradecadiene                                                         | 91 |
|        |      | Z-13-Octadecen-1-yl acetate                                                | 70 |
|        |      | Cycloundecene, 1-methyl-                                                   | 64 |
| 55.105 | 0.96 | Cetene                                                                     | 98 |
| 55.225 | 0.54 | Hexadecane                                                                 | 96 |
| 55.686 | 0.25 | Bicyclo[3.1.1]heptan-3-one, 2,6,6-trimethyl-, (1.alpha.,2.beta.,5.alpha.)- | 43 |
|        |      | Cyclohexane, 1,1,3,5-tetramethyl-, cis-                                    | 38 |
|        |      | 1-Pentyn-3-ol, 3-methyl-, carbamat                                         | 35 |
| 56.578 | 0.38 | 4(3H)-Quinazolinone, 3-amino-2-methyl-                                     | 50 |
|        |      | 4-Methyl-2,6-dihydroxyquinoline                                            | 49 |
|        |      | Precocene I                                                                | 47 |
| 57.335 | 0.11 | 4,5-Decanediol, 6-ethyl-                                                   | 41 |
|        |      | 3-Hepten-2-one, 3-propyl-                                                  | 38 |
|        |      | Silane, trifluoro(2-methyl-2-butenyl)-                                     | 38 |
| 57.362 | 0.07 | Silane, trifluoro(2-methyl-2-butenyl)-                                     | 58 |
|        |      | Cyclopropanecarboxylic acid, methyl ester                                  | 47 |
|        |      | 2-Heptenal, 2-propyl-                                                      | 46 |
| 57.437 | 0.23 | 1-(4-methylthiophenyl)-2-propanone                                         | 64 |
|        |      | Homovanillic acid                                                          | 58 |
|        |      | (-)-R-Phenethanamine, 1-methyl-N-vanillyl-                                 | 53 |
| 57.804 | 0.39 | Fluorene                                                                   | 90 |
| 58.377 | 0.33 | Terephthalic acid, 3,4-dichlorophenyl ethyl ester                          | 72 |
|        |      | Isophthalic acid, ethyl 2-methoxyethyl ester                               | 72 |
|        |      | Terephthalic acid, 3,5-difluorophenyl ethyl ester                          | 72 |
| 58.542 | 0.07 | Diethyl Phthalate                                                          | 55 |
| 58.895 | 0.16 | 1,19-Eicosadiene                                                           | 76 |
|        |      | 1,9-Tetradecadiene                                                         | 70 |
|        |      | Ethanol, 2-(9-octadecenylloxy)-, (Z)-                                      | 68 |
| 58.973 | 0.9  | E-14-Hexadecenal                                                           | 99 |
|        |      | 3-Heptadecene, (Z)-                                                        | 95 |
|        |      | 1-Heptadecene                                                              | 95 |
| 59.075 | 0.43 | Heptadecane                                                                | 98 |
| 59.311 | 0.07 | Phenmethanol, 2-, alpha., alpha.-trimethyl-                                | 49 |
|        |      | 3,4-Dimethylbenzamide                                                      | 46 |
|        |      | 4-Ethylbenzoic acid, 2-chloroethyl ester                                   | 38 |
| 59.686 | 0.48 | Benzene, 1,1'-(1,3-propanediyl)bis                                         | 97 |
| 59.974 | 0.51 | Benzophenone                                                               | 93 |
| 60.244 | 0.25 | 1,4-Benzenedicarboxylic acid, diethyl ester                                | 46 |
|        |      | (2-Hydroxy-3,5-dimethylbenzoyl)formic acid                                 | 35 |
| 60.945 | 0.53 | Cyclohexane, 1,2,4-trimethyl-                                              | 55 |
|        |      | Cyclohexane, 1,2,4,5-tetraethyl-, (1.alpha.,2.alpha.,4.alpha.,5.alpha.)-   | 52 |
|        |      | Cyclopentane, 1-pentyl-2-propyl-                                           | 49 |
| 61.965 | 0.44 | Thieno[2,3-d]-1,3-thiaselenol-2-thione                                     | 56 |
|        |      | Cyclohexane, 1,2,4-trimethyl-                                              | 50 |

|        |      |                                                                              |    |
|--------|------|------------------------------------------------------------------------------|----|
| 62.231 | 2.76 | 3-(Benzylthio)acrylic acid, methylester                                      | 35 |
| 62.651 | 2.4  | E-15-Heptadecenal                                                            | 99 |
|        |      | 1-Nonadecene                                                                 | 94 |
|        |      | Trifluoroacetoxy hexadecane                                                  | 94 |
| 62.883 | 0.32 | 1,1-Diphenylcyclopropane                                                     | 95 |
|        |      | Naphthalene, 2-(1-cyclopenten-1-yl)-                                         | 93 |
|        |      | 10,11-Dihydro-5H-dibenzo(a,d)cycloheptene                                    | 83 |
| 63.164 | 0.31 | Cyclopentane, 1,1'-[3-(2-cyclopentylethyl)-1,5-pentanediy]bis-               | 47 |
|        |      | Cyclohexane, 1,1,2-trimethyl-                                                | 38 |
|        |      | 2,3,4-Trimethyl-hex-3-enal                                                   | 30 |
| 63.476 | 0.27 | Boranamine, 1-chloro-1-ethyl-N-methyl-N-phenyl-                              | 42 |
| 63.794 | 0.37 | Farnesol isomer a                                                            | 38 |
|        |      | 4-Hexen-1-ol, 2-ethenyl-2,5-dimethyl-                                        | 38 |
| 64.229 | 0.05 | Phenol, 2-methyl-4-(1,1,3,3-tetramethylbutyl)-                               | 47 |
|        |      | Phthalic acid, isohexyl neopentyl ester                                      | 38 |
|        |      | Phthalic acid, di(2-propylpentyl) ester                                      | 38 |
| 64.252 | 0.03 | Pyridine-3-carbonitrile, 1-(2-hydroxypropyl)-4,6-dimethyl-2-oxo-1,2-dihydro- | 46 |
|        |      | 3',8,8'-Trimethoxy-3-piperidyl-2,2'-binaphthalene-1,1',4,4'-tetrone          | 46 |
|        |      | Diisooctyl phthalate                                                         | 46 |
| 64.326 | 0.09 | Bis(2-ethylhexyl) phthalate                                                  | 53 |
|        |      | Phthalic acid, 6-ethyloct-3-yl 2-ethylhexyl ester                            | 47 |
|        |      | Bis(2-ethylhexyl) phthalate                                                  | 46 |
| 64.469 | 0.14 | Phthalic acid, di(2-propylpentyl) ester                                      | 49 |
|        |      | 4-Methoxyanthranilic acid                                                    | 46 |
|        |      | 2-(Nonyloxycarbonyl)benzoic acid                                             | 46 |
| 64.859 | 0.29 | 9H-Fluoren-9-one                                                             | 93 |
|        |      | Benzo[h]cinnoline                                                            | 87 |
| 65.099 | 0.23 | Benzene, 1,1'-(3-methyl-1-propene-1,3-diyl)bis-                              | 94 |
|        |      | Benzene, 1,1'-(1,2-dimethyl-1,2-ethenediyl)bis-, (E)-                        | 92 |
| 65.815 | 0.15 | Phenanthrene                                                                 | 92 |
|        |      | 7,8-Diphenylbicyclo[4.2.1]nona-2,4,7-triene                                  | 89 |
|        |      | 1,10b(2H)-Dihydropyrano[3,4,5-jk]fluorene                                    | 81 |
| 65.976 | 0.09 | 2-[4-Chlorophenyl]-5-pyrimidinamin                                           | 43 |
|        |      | Quinolin-5(6H)-one, 7,8-dihydro-2-hydroxy-4,7,7-trimethyl-                   | 43 |
| 66.145 | 2.23 | Z-5-Nonadecene                                                               | 99 |
|        |      | 1-Nonadecene                                                                 | 99 |
| 67.198 | 0.11 | 1,4-Benzenedicarboxylic acid, ethyl methyl ester                             | 44 |
|        |      | Acetic acid, (2,3,4,5-tetrafluorophenyl)methyl ester                         | 35 |
|        |      | 1H-Indole, 5-methyl-2-phenyl-                                                | 25 |
| 68.266 | 0.75 | Terephthalic acid, 2-chloroethyl isobutyl ester                              | 38 |
|        |      | Succinic acid, di(4-chlorophenyl) ester                                      | 32 |
|        |      | Succinic acid, di(3-chlorophenyl) ester                                      | 32 |
| 68.502 | 0.26 | Pyridine-3-carboxamide, oxime, N-(2-trifluoromethylphenyl)-                  | 91 |
|        |      | 1-Decanol, 2-hexyl-                                                          | 43 |
|        |      | 5-Methyl-Z-5-docosene                                                        | 41 |
| 69.458 | 0.14 | Cyclohexane, 1-(cyclohexylmethyl)-4-ethyl-, trans-                           | 46 |
|        |      | Cyclohexane, 1,1'-(2-propyl-1,3-propanediyl)bis-                             | 41 |
|        |      | Cyclohexane, 1,1'-(2-ethyl-1,3-propanediyl)bis-                              | 38 |
| 69.473 | 0.06 | Corydaldine                                                                  | 45 |
|        |      | 2-Methyl-2-docosene                                                          | 38 |
|        |      | 1,3-Dioxolane, 4-ethyl-5-octyl-2,2-bis(trifluoromethyl)-, trans-             | 38 |
| 69.661 | 2.06 | 5-Eicosene, (E)-                                                             | 98 |
|        |      | 1-Octadecene                                                                 | 96 |
|        |      | 9-Tricosene, (Z)-                                                            | 96 |
| 69.904 | 0.31 | Isophthalic acid, 2-chloroethyl ethyl ester                                  | 96 |
|        |      | (3R,5R,7aR)-3-Butyl-5-hexylhexahydro-1H-pyrrolizine                          | 40 |
|        |      | Isophthalic acid                                                             | 38 |
| 70.62  | 0.13 | Trimethylsilyl 3-methylbenzoate                                              | 49 |

|         |      |                                                                                    |    |
|---------|------|------------------------------------------------------------------------------------|----|
|         |      | Iminostilbene                                                                      | 46 |
|         |      | Glycine, N-[4-[(trimethylsilyl)oxy]benzoyl]-, methyl ester                         | 46 |
| 71.426  | 0.63 | Pentadecanoic acid                                                                 | 48 |
|         |      | n-Hexadecanoic acid                                                                | 42 |
| 71.636  | 0.51 | 1-Cyclohexyl-1-(4-methylcyclohexyl)ethane                                          | 43 |
|         |      | Cyclohexane, 1-ethyl-2-propyl-                                                     | 38 |
|         |      | Cyclohexanone, 2-(1-mercapto-1-methylethyl)-5-methyl-, trans-                      | 35 |
| 73.975  | 2.1  | 11-Tricosene                                                                       | 97 |
|         |      | Octacosyl trifluoroacetate                                                         | 91 |
|         |      | 10-Heneicosene (c,t)                                                               | 91 |
| 74.305  | 0.03 | Cyclopentane, 1,1'-[3-(2-cyclopentylethyl)-1,5-pentanediy]bis-                     | 87 |
|         |      | Cyclohexane, 1,1'-(2-propyl-1,3-propanediy]bis-                                    | 45 |
|         |      | But-2-enamide, N-decyl-N-methyl-3-methyl-                                          | 44 |
| 78.425  | 0.35 | Bicyclo[3.1.1]heptan-3-one, 2-(2,2-dimethylpropyl)-6,6-dimethyl-, (stereoisomer 2) | 50 |
|         |      | Fumaric acid, pent-4-en-2-yl tridecyl ester                                        | 32 |
|         |      | Ethyl 2-acetamido-3,3,3-trifluoro-2-(2-fluoroanilino)propionate                    | 25 |
| 79.49   | 2.07 | 9-Tricosene, (Z)-                                                                  | 98 |
|         |      | 1-Nonadecene                                                                       | 98 |
| 79.88   | 0.18 | 4-Dehydroxy-N-(4,5-methylenedioxy-2-nitrobenzylidene)tyramine                      | 42 |
|         |      | Cyclopentane, 1,1'-[3-(2-cyclopentylethyl)-1,5-pentanediy]bis-                     | 38 |
| 82.155  | 0.02 | p-Terphenyl                                                                        | 90 |
|         |      | m-Terphenyl                                                                        | 64 |
| 83.778  | 0.6  | Cyclooctane, 1-methyl-3-propyl-                                                    | 47 |
|         |      | Cyclohexane, 1,1,3,5-tetramethyl-,cis-                                             | 47 |
| 84.153  | 1.26 | 2-Benzoyl-3-isobutylidene-hexahydro-pyrrolo[1,2-a]pyrazin-1,4-dione                | 59 |
|         |      | 4-Cyanobenzophenone                                                                | 59 |
|         |      | Hydrazinecarboxylic acid, 2-benzoyl-, ethyl ester                                  | 52 |
| 85.979  | 0.27 | Terephthalic acid, di(2-chloroethyl) ester                                         | 56 |
| 86.691  | 2.14 | Octacosyl heptafluorobutyrate                                                      | 93 |
|         |      | 1-Tricosene                                                                        | 93 |
|         |      | Hexacosyl heptafluorobutyrate                                                      | 93 |
| 96.134  | 1.87 | Octacosyl heptafluorobutyrate                                                      | 92 |
|         |      | Cyclotetracosane                                                                   | 90 |
|         |      | Dotriacontyl heptafluorobutyrate                                                   | 86 |
| 108.56  | 0.7  | 1-Hexadecanol, 2-methyl-                                                           | 83 |
|         |      | 5-Eicosene, (E)-                                                                   | 78 |
|         |      | Hexadecane, 1-(ethenyl)-                                                           | 62 |
| 108.613 | 0.93 | 9-Tricosene, (Z)-                                                                  | 81 |
|         |      | 1-Decanol, 2-hexyl-                                                                | 60 |
|         |      | 9-Tricosene, (Z)-                                                                  | 55 |
| 110.81  | 5.25 | (2,3-Diphenylcyclopropyl)methyl phenyl sulfoxide, trans-                           | 38 |

| Table S6. CS-F1@750 composition |       |                                                                                             |      |
|---------------------------------|-------|---------------------------------------------------------------------------------------------|------|
| RT                              | Area% | Library/ID                                                                                  | Qual |
| 5.394                           | 0.86  | N-(2,2-Dichloro-1-hydroxy-ethyl)-2,2-dimethyl-propionamide                                  | 50   |
|                                 |       | 1,8-Nonadien-3-ol                                                                           | 38   |
|                                 |       | Acetic acid, chloro-, 1-methylbutyl ester                                                   | 38   |
| 6.98                            | 1.79  | Ethyl Acetate                                                                               | 86   |
| 11.171                          | 0.59  | 2-Propanone, 1-hydroxy-                                                                     | 59   |
| 18.458                          | 0.3   | Succindialdehyde                                                                            | 72   |
|                                 |       | N,N,N'-Trimethyl-1,3-propanediamin                                                          | 40   |
|                                 |       | 1,3-Propanediamine, N(1),N(1)-dimethyl-N(3)-(7-methyl[1,2,4]triazolo[4,3-a]pyrimidin-5-yl)- | 38   |
| 22.664                          | 0.76  | 2-Furanmethanol                                                                             | 97   |
| 26.346                          | 1.04  | 2-Cyclopenten-1-one, 2-hydroxy-                                                             | 80   |
|                                 |       | 1,3-Cyclopentanedione                                                                       | 72   |
|                                 |       | Cyclopentanone, 2-methyl-                                                                   | 64   |
| 27.924                          | 0.51  | 2(5H)-Furanone                                                                              | 59   |
|                                 |       | 2H-Pyran, 3,4-dihydro-                                                                      | 43   |
| 32.047                          | 1.57  | 2-Cyclopenten-1-one, 2-hydroxy-3-methyl-                                                    | 91   |
|                                 |       | 1,2-Cyclopentanedione, 3-methyl-                                                            | 90   |
|                                 |       | 2-Cyclopenten-1-one, 2-hydroxy-3-methyl-                                                    | 87   |
| 32.452                          | 1.21  | Phenol                                                                                      | 94   |
| 35.14                           | 0.56  | Phenol, 2-methoxy-                                                                          | 91   |
| 35.451                          | 0.54  | p-Cresol                                                                                    | 95   |
|                                 |       | Phenol, 2-methyl-                                                                           | 94   |
| 36.609                          | 0.66  | Oxirane, butyl-                                                                             | 42   |
|                                 |       | 3-Buten-2-ol, 2-methyl-                                                                     | 37   |
|                                 |       | 1-Hydroxy-2-pentanone                                                                       | 36   |
| 36.92                           | 2.14  | p-Cresol                                                                                    | 94   |
| 37.205                          | 0.76  | Cyclododecane                                                                               | 90   |
|                                 |       | 1-Tridecene                                                                                 | 83   |
|                                 |       | Cyclopentane, butyl-                                                                        | 76   |
| 37.43                           | 0.45  | Dodecane                                                                                    | 95   |
| 38.086                          | 1.93  | Cyclopropyl carbinol                                                                        | 53   |
|                                 |       | Glutaraldehyde                                                                              | 36   |
|                                 |       | Pentanal                                                                                    | 36   |
| 39.829                          | 0.35  | Phenol, 2,5-dimethyl-                                                                       | 93   |
|                                 |       | Phenol, 2-ethyl-                                                                            | 87   |
| 40.444                          | 0.6   | 2-Methoxy-5-methylphenol                                                                    | 87   |
|                                 |       | Creosol                                                                                     | 87   |
|                                 |       | 2-Methoxy-6-methylphenol                                                                    | 83   |
| 41.243                          | 0.9   | Benzoic acid                                                                                | 93   |
| 41.34                           | 0.08  | Phenol, 3,5-dimethyl-                                                                       | 50   |
|                                 |       | Phenol, 3,4-dimethyl-                                                                       | 50   |
|                                 |       | Benzene, nitroso-                                                                           | 46   |
| 41.906                          | 0.37  | 1,12-Tridecadiene                                                                           | 43   |
|                                 |       | Bicyclo[3.1.1]heptane, 2,6,6-trimethyl-, [1R-(1.alpha.,2.beta.,5.alpha.)]-                  | 35   |
|                                 |       | (R)-(-)-(Z)-14-Methyl-8-hexadecen-1-ol                                                      | 35   |
| 42.094                          | 0.93  | 1-Tridecene                                                                                 | 96   |
| 42.296                          | 1.26  | Tridecane                                                                                   | 60   |
|                                 |       | Decane, 1-iodo-                                                                             | 35   |
| 42.933                          | 0.47  | Cyclohexane, 1,2,4-trimethyl-                                                               | 38   |
| 43.664                          | 1.71  | 3-Aminopiperidin-2-one                                                                      | 52   |
|                                 |       | Cyclopropanecarboxamide, N-2-methylpropyl                                                   | 47   |
|                                 |       | dl-Citrulline                                                                               | 40   |
| 44.118                          | 0.38  | Phenol, 4-(1-methylethyl)-                                                                  | 87   |
|                                 |       | Phenol, 2-ethyl-6-methyl-                                                                   | 87   |
| 45.685                          | 0.65  | 5-Hydroxymethylfurfural                                                                     | 58   |
|                                 |       | 2,4-Hexadienedioic acid, (Z,Z)-                                                             | 52   |
| 45.715                          | 0.12  | 5-Hydroxymethylfurfural                                                                     | 43   |

|        |      |                                                                                            |    |
|--------|------|--------------------------------------------------------------------------------------------|----|
|        |      | 4-Pyrimidinol, 5-methoxy-                                                                  | 38 |
| 45.82  | 1.29 | Caprolactam                                                                                | 76 |
|        |      | 3,4-Dimethyl-isoxazol-5(4H)-one                                                            | 50 |
| 46.528 | 0.44 | 9-Octadecen-1-ol, (Z)-                                                                     | 87 |
|        |      | cis-7-Dodecen-1-yl acetate                                                                 | 83 |
|        |      | 9-Nonadecyne                                                                               | 76 |
| 46.689 | 1.58 | Cyclotetradecane                                                                           | 95 |
|        |      | Cyclopropane, nonyl-                                                                       | 93 |
|        |      | 1-Tetradecene                                                                              | 91 |
| 46.851 | 0.6  | Tetradecane                                                                                | 94 |
| 48.477 | 0.61 | Biphenyl                                                                                   | 81 |
| 50.892 | 0.33 | 9-Octadecen-1-ol, (E)-                                                                     | 91 |
|        |      | 11-Hexadecen-1-ol, (Z)-                                                                    | 87 |
|        |      | Cyclopentadecanol                                                                          | 86 |
| 51.019 | 1.93 | 1-Pentadecene                                                                              | 98 |
|        |      | 1-Tridecene                                                                                | 97 |
| 51.158 | 0.86 | Pentadecane                                                                                | 94 |
| 52.563 | 0.64 | Phenol, 2-methoxy-4-(1-propenyl)-                                                          | 92 |
|        |      | Phenol, 2-methoxy-5-(1-propenyl)-, (E)-                                                    | 76 |
| 53.534 | 0.61 | Butylated Hydroxytoluene                                                                   | 94 |
| 55     | 0.24 | 1-Hexadecyne                                                                               | 96 |
|        |      | 1,13-Tetradecadiene                                                                        | 95 |
| 55.113 | 1.87 | Z-8-Hexadecene                                                                             | 99 |
|        |      | Cetene                                                                                     | 97 |
|        |      | Cyclohexadecane                                                                            | 94 |
| 55.233 | 1.04 | Heneicosane                                                                                | 92 |
|        |      | Hexadecane                                                                                 | 91 |
|        |      | Eicosane                                                                                   | 89 |
| 55.367 | 0.2  | trans-4-(2-(5-Nitro-2-furyl)vinyl)-2-quinolinamine                                         | 30 |
| 57.819 | 0.52 | Fluorene                                                                                   | 76 |
| 58.674 | 4.58 | Cyclopentanecarboxamide, 3-ethenyl-2-(3-pentenylidene)-N-phenyl-, .alpha.,2Z(E),3.alpha.]- | 59 |
| 58.88  | 0.55 | Oxirane, hexadecyl-                                                                        | 60 |
|        |      | 1,13-Tetradecadiene                                                                        | 58 |
|        |      | 1-Cyclohexylheptene                                                                        | 55 |
| 58.981 | 2.34 | E-14-Hexadecenal                                                                           | 99 |
|        |      | 9-Nonadecene                                                                               | 95 |
|        |      | 3-Heptadecene, (Z)-                                                                        | 95 |
| 59.082 | 0.95 | Heptadecane                                                                                | 91 |
|        |      | Nonadecane, 9-methyl-                                                                      | 90 |
| 59.967 | 0.6  | Benzophenone                                                                               | 94 |
| 60.451 | 0.7  | N-Benzyl-N-ethyl-p-isopropylbenzamide                                                      | 35 |
| 60.953 | 0.33 | Pyridine-3-carboxamide, oxime, N-(2-trifluoromethylphenyl)-                                | 92 |
|        |      | Cyclohexane, 1,1,2-trimethyl-                                                              | 42 |
|        |      | Cyclohexane, 1-ethyl-2-propyl-                                                             | 38 |
| 62.655 | 4.02 | E-15-Heptadecenal                                                                          | 99 |
|        |      | 1-Octadecene                                                                               | 98 |
| 63.806 | 0.36 | Bicyclo[3.1.1]heptan-3-one, 2,6,6-trimethyl-, (1.alpha.,2.alpha.,5.alpha.)-                | 46 |
|        |      | Cyclohexane, 1-(cyclohexylmethyl)-4-ethyl-, cis-                                           | 45 |
| 66.16  | 4.49 | Z-5-Nonadecene                                                                             | 99 |
|        |      | 1-Heptadecene                                                                              | 97 |
|        |      | 1-Nonadecene                                                                               | 95 |
| 69.669 | 4.49 | 9-Tricosene, (Z)-                                                                          | 98 |
|        |      | 10-Heneicosene (c,t)                                                                       | 93 |
|        |      | Dotriacontyl pentafluoropropionate                                                         | 93 |
| 71.652 | 0.36 | Silicic acid, diethyl bis(trimethylsilyl) ester                                            | 38 |
|        |      | Pyridine-3-carboxamide, oxime, N-(2-trifluoromethylphenyl)-                                | 30 |
|        |      | Fumaric acid, pent-4-en-2-yl tridecyl ester                                                | 27 |
| 73.987 | 4.23 | 1-Nonadecene                                                                               | 95 |

|         |      |                                                                                         |    |
|---------|------|-----------------------------------------------------------------------------------------|----|
|         |      | Heptadecyl trifluoroacetate                                                             | 93 |
|         |      | Heptadecyl heptafluorobutyrate                                                          | 91 |
| 76.457  | 0.86 | Piperidine, 1-(5-trifluoromethyl-2-pyridyl)-4-(1H-pyrrol-1-yl)-                         | 56 |
|         |      | Formic acid, 1-(4,7-dihydro-2-methyl-7-oxopyrazolo[1,5-a]pyrimidin-5-yl)-, methyl ester | 30 |
|         |      | 4H-1,2,4-Triazole-3-thiol, 4-allyl-5-(1-naphthylmethyl)-                                | 25 |
| 76.484  | 1.2  | 4H-1,2,4-Triazole-3-thiol, 4-allyl-5-(1-naphthylmethyl)-                                | 30 |
|         |      | 5-(p-Aminophenyl)-4-(p-tolyl)-2-thiazolamine                                            | 27 |
|         |      | 3-Ethoxy-1,1,1,5,5,5-hexamethyl-3-(trimethylsiloxy)trisiloxane                          | 27 |
| 77.394  | 1.14 | N-Benzyl-N-ethyl-p-isopropylbenzamide                                                   | 27 |
|         |      | 2,2,2-Trifluoro-N-[2-(1-hydroxy-2,2,6,6-tetramethyl-piperidin-4-yl)-ethyl]-acetamide    | 15 |
|         |      | 2,5-Dihydroxyacetophenone, bis(trimethylsilyl) ether                                    | 15 |
| 79.516  | 4.01 | Ethanol, 2-(tetradecyloxy)-                                                             | 93 |
|         |      | 9-Tricosene, (Z)-                                                                       | 92 |
|         |      | 1-Tricosene                                                                             | 91 |
| 83.842  | 1.6  | 3-Isopropoxy-1,1,1,5,5,5-hexamethyl-3-(trimethylsiloxy)trisiloxane                      | 38 |
|         |      | 2,2,2-Trifluoro-N-[2-(1-hydroxy-2,2,6,6-tetramethyl-piperidin-4-yl)-ethyl]-acetamide    | 35 |
| 83.902  | 1.13 | 5-(p-Aminophenyl)-4-(O-tolyl)-2-thiazolamine                                            | 30 |
|         |      | 3,6-Bis(N-dimethylamino)-9-ethylcarbazole                                               | 30 |
| 86.687  | 4.09 | 9-Tricosene, (Z)-                                                                       | 95 |
|         |      | 1-Tricosene                                                                             | 78 |
|         |      | Octatriacontyl pentafluoropropionate                                                    | 78 |
| 91.249  | 1.21 | Cyclotetrasiloxane, octamethyl-                                                         | 30 |
|         |      | 4H-1,2,4-Triazole-3-thiol, 4-allyl-5-(1-naphthylmethyl)-                                | 25 |
| 91.287  | 0.32 | Piperidine, 1-(5-trifluoromethyl-2-pyridyl)-4-(1H-pyrrol-1-yl)-                         | 56 |
|         |      | 1,2-Benzenediol, 3,5-bis(1,1-dimethylethyl)-                                            | 25 |
| 96.123  | 1.74 | 1-Tricosene                                                                             | 93 |
|         |      | Cyclotetracosane                                                                        | 92 |
|         |      | E-15-Heptadecenal                                                                       | 92 |
| 96.149  | 0.28 | Ethanol, 2-(tetradecyloxy)-                                                             | 91 |
|         |      | 9-Tricosene, (Z)-                                                                       | 89 |
|         |      | 13-Tetradecen-1-ol acetate                                                              | 89 |
| 96.171  | 1.52 | Ethanol, 2-(tetradecyloxy)-                                                             | 91 |
|         |      | 1-Tricosene                                                                             | 74 |
|         |      | Octacosyl trifluoroacetate                                                              | 64 |
| 97.393  | 0.17 | 4-Nitro-4'-chlorodiphenylsulfoxide                                                      | 53 |
| 97.461  | 0.05 | Formic acid, 1-(4,7-dihydro-2-methyl-7-oxopyrazolo[1,5-a]pyrimidin-5-yl)-, methyl ester | 30 |
|         |      | N-Benzyl-N-ethyl-p-isopropylbenzamide                                                   | 27 |
| 104.733 | 0.34 | 3,6-Dioxa-2,4,5,7-tetrasilaoctane,2,2,4,4,5,5,7,7-octamethyl-                           | 38 |
|         |      | 3-Isopropoxy-1,1,1,5,5,5-hexamethyl-3-(trimethylsiloxy)trisiloxane                      | 30 |
| 104.857 | 0.74 | 2-(Acetoxymethyl)-3-(methoxycarbonyl)biphenylene                                        | 25 |
|         |      | Ergonovine                                                                              | 25 |
|         |      | Formic acid, 1-(4,7-dihydro-2-methyl-7-oxopyrazolo[1,5-a]pyrimidin-5-yl)-, methyl ester | 25 |
| 108.613 | 2.19 | 9-Tricosene, (Z)-                                                                       | 94 |
|         |      | 9-Tricosene, (Z)-                                                                       | 35 |
| 108.696 | 1.36 | Oxalic acid, hexadecyl propyl este                                                      | 27 |
|         |      | Cyclohexane, 1,1'-(2-ethyl-1,3-propanediyl)bis-                                         | 27 |
| 112.189 | 2.47 | 5-(p-Aminophenyl)-4-(O-tolyl)-2-thiazolamine                                            | 30 |
|         |      | 2,4-Cyclohexadien-1-one, 3,5-bis(1,1-dimethylethyl)-4-hydroxy-                          | 20 |

| Table S7. Composition of CS-F2@750 |       |                                                |      |
|------------------------------------|-------|------------------------------------------------|------|
| RT                                 | Area% | Library/ID                                     | Qual |
| 5.398                              | 0.29  | Methylene chloride                             | 76   |
| 6.582                              | 0.14  | Formic acid, 2-methylpentyl ester              | 28   |
| 6.991                              | 0.7   | Ethyl Acetate                                  | 80   |
| 9.308                              | 3.35  | Acetic acid                                    | 91   |
| 11.186                             | 4.81  | 2-Propanone, 1-hydroxy-                        | 45   |
| 14.335                             | 0.09  | Toluene                                        | 81   |
|                                    |       | Spiro[2,4]hepta-4,6-diene                      | 81   |
|                                    |       | 1,3,5-Cycloheptatriene                         | 74   |
| 14.458                             | 0.34  | Propanoic acid                                 | 87   |
| 18.833                             | 0.77  | Propanoic acid, 2-oxo-, methyl ester           | 72   |
| 19.512                             | 0.52  | Butanoic acid                                  | 72   |
|                                    |       | Propanedioic acid, propyl-                     | 39   |
| 20.591                             | 0.99  | Furfural                                       | 87   |
| 22.087                             | 0.37  | 1,3,5,7-Cyclooctatetraene                      | 96   |
|                                    |       | Styrene                                        | 94   |
|                                    |       | Bicyclo[4.2.0]octa-1,3,5-triene                | 81   |
| 22.653                             | 2.33  | 2-Furanmethanol                                | 98   |
| 23.076                             | 0.5   | 2-Propanone, 1-(acetyloxy)-                    | 72   |
|                                    |       | 1,2-Ethanediol, diacetate                      | 56   |
|                                    |       | 2,3-Butanedione                                | 50   |
| 23.406                             | 0.07  | Acetic acid, nitro-, methyl ester              | 38   |
|                                    |       | 1-Cyclohexyl-3-ethoxy-butan-2-one              | 37   |
| 23.421                             | 0.06  | Hydrazine, 1,1-diethyl-                        | 50   |
|                                    |       | Acetic acid, nitro-, methyl ester              | 33   |
|                                    |       | 1,3-Dioxolane, 2-(1-bromoethyl)-               | 32   |
| 24.456                             | 0.11  | 2-Cyclopenten-1-one, 2-methyl-                 | 86   |
|                                    |       | Cyclopentene                                   | 70   |
| 24.482                             | 0.07  | 2-Cyclopenten-1-one, 2-methyl-                 | 80   |
|                                    |       | Cyclopentene                                   | 70   |
|                                    |       | 2-Cyclopenten-1-one, 3-methyl-                 | 59   |
| 25.011                             | 0.29  | Ethanone, 1-(2-furanyl)-                       | 83   |
| 25.104                             | 0.16  | Crotonyl isothiocyanate                        | 59   |
|                                    |       | Methacrylic anhydride                          | 59   |
|                                    |       | 2-Butenoyl chloride                            | 59   |
| 26.349                             | 2.39  | 2-Cyclopenten-1-one, 2-hydroxy-                | 86   |
|                                    |       | 1,2-Cyclopentanedione                          | 64   |
| 26.754                             | 0.3   | Propyl aldoxime, 2-methyl-, syn-               | 47   |
|                                    |       | Thiocyanic acid, 2-propynyl ester              | 47   |
|                                    |       | 2-Furanmethanol                                | 45   |
| 27.74                              | 0.47  | Butyrolactone                                  | 83   |
|                                    |       | Butanoic acid, 4-hydroxy-                      | 64   |
| 27.931                             | 1.27  | 2(5H)-Furanone                                 | 90   |
|                                    |       | Propargyl alcohol                              | 43   |
| 28.415                             | 1     | 2-Furancarboxaldehyde, 5-methyl-               | 94   |
| 29.082                             | 0.68  | 1,3-Butadiene, 2-methyl-                       | 86   |
|                                    |       | 2-Cyclopenten-1-one, 2-methyl-                 | 81   |
|                                    |       | 2-Cyclopenten-1-one, 3-methyl-                 | 70   |
| 29.757                             | 0.14  | Benzonitrile                                   | 87   |
|                                    |       | Tricyclo[3.1.0.0(2,4)]hex-3-ene-3-carbonitrile | 86   |
|                                    |       | Benzonitrile                                   | 86   |
| 29.948                             | 0.56  | 1H-Imidazole-2-carboxaldehyde, 1-methyl-       | 50   |
|                                    |       | 4(1H)-Pyrimidinone, 6-methyl-                  | 47   |
|                                    |       | 1-(Dimethylamino)pyrrole                       | 47   |

|        |      |                                                             |    |
|--------|------|-------------------------------------------------------------|----|
| 30.15  | 0.13 | Tetrahydrofurfuryl chloride                                 | 53 |
|        |      | Borinic acid, diethyl-, methyl ester                        | 53 |
|        |      | trans-2-Methyl-4-hexen-3-ol                                 | 50 |
| 30.574 | 0.26 | Oxazolidine, 2,2-diethyl-3-methyl-                          | 40 |
| 31.012 | 0.22 | 3-Buten-1-ol, 3-methyl-2-methylene                          | 64 |
|        |      | Cyclopropanecarboxylic acid, 5-fluoro-2-nitrophenyl ester   | 59 |
|        |      | 2-Propenoic acid, 2-methyl-, 2-propenyl ester               | 59 |
| 31.368 | 0.07 | Indene                                                      | 91 |
| 32.054 | 2.1  | 1,2-Cyclopentanedione, 3-methyl-                            | 93 |
|        |      | 2-Cyclopenten-1-one, 2-hydroxy-3-methyl-                    | 91 |
| 32.231 | 0.18 | Undecane                                                    | 87 |
| 32.444 | 2.84 | Phenol                                                      | 94 |
| 32.647 | 0.33 | 2-Cyclopenten-1-one, 2,3-dimethyl-                          | 81 |
|        |      | 3-Methyl-3-cyclohexen-1-one                                 | 58 |
| 32.962 | 0.15 | 1-Oxetan-2-one, 4-methyl-3-methylene-                       | 60 |
|        |      | 4-Methyl-2,6,7-trioxa-1-phosphabicyclo[2.2.2]octane 1-oxide | 50 |
|        |      | Cycloheptene                                                | 50 |
| 33.307 | 0.17 | Benzene, 1-fluoro-4-methoxy-                                | 50 |
|        |      | 3H-Pyrazol-3-one, 1,2-dihydro-1,2,5-trimethyl-              | 50 |
|        |      | Benzene, 1-fluoro-2-methoxy-                                | 50 |
| 33.839 | 0.28 | Acetophenone                                                | 93 |
| 34.592 | 0.24 | Phenol, 4-bromo-                                            | 68 |
|        |      | Phenol, 3-bromo-                                            | 62 |
|        |      | Phenol, 2-bromo-                                            | 62 |
| 34.907 | 0.57 | 2,4,5-Trihydroxypyrimidine                                  | 43 |
|        |      | 1-Methyl-2,4,5-trioxoimidazolidine                          | 42 |
|        |      | D-Alanine, N-allyloxycarbonyl-, heptadecyl ester            | 35 |
| 35.143 | 1.38 | Phenol, 2-methoxy-                                          | 96 |
| 35.454 | 0.68 | Phenol, 2-methyl-                                           | 98 |
|        |      | p-Cresol                                                    | 94 |
| 35.694 | 0.31 | Methyl 2-furoate                                            | 72 |
|        |      | Furan-2-carboxylic acid, 3-formylphenyl ester               | 64 |
| 36.017 | 0.31 | Cyclopropane, 1,1-dichloro-2-methyl-2-(1-methylbutyl)-      | 47 |
|        |      | 4-Methyl-5H-furan-2-one                                     | 38 |
| 36.628 | 1.62 | 3-Penten-2-ol                                               | 64 |
|        |      | 2-Furanmethanol, tetrahydro-                                | 64 |
|        |      | Tetrahydrofurfuryl acrylate                                 | 59 |
| 36.811 | 0.77 | Maltol                                                      | 91 |
| 36.916 | 1.83 | p-Cresol                                                    | 93 |
|        |      | Phenol, 2-methyl-                                           | 64 |
| 37.198 | 0.57 | Cyclododecane                                               | 95 |
|        |      | Chloroacetic acid, undecyl ester                            | 95 |
|        |      | 1-Tridecene                                                 | 91 |
| 37.419 | 0.47 | Dodecane                                                    | 87 |
|        |      | Tridecane                                                   | 72 |
| 38.082 | 1.04 | 1,3-Propanediamine, N-methyl-                               | 59 |
|        |      | Acetic acid, [(aminocarbonyl)amino]oxo-                     | 42 |
|        |      | 1-Guanidinosuccinimide                                      | 36 |
| 38.213 | 0.21 | Bicyclo[3.1.0]hexan-3-one                                   | 53 |
|        |      | 2-Cyclopenten-1-one, 3-methyl-                              | 53 |
|        |      | 2,3-Pentadiene                                              | 52 |
| 39.387 | 0.34 | Naphthalene                                                 | 93 |
|        |      | 1H-Indene, 1-methylene-                                     | 87 |
|        |      | Azulene                                                     | 87 |
| 39.822 | 0.33 | Phenol, 2,5-dimethyl-                                       | 94 |



|        |      |                                                                            |    |
|--------|------|----------------------------------------------------------------------------|----|
|        |      | Phenol, 2,3-dimethyl-                                                      | 94 |
| 40.301 | 0.24 | 4H-Pyran-4-one, 3,5-dihydroxy-2-methyl-                                    | 76 |
|        |      | 4H-Pyran-4-one, 3,5-dihydroxy-2-methyl-                                    | 58 |
|        |      | 2,4(1H,3H)-Pyrimidinedione, dihydro-1,3-dimethyl-                          | 47 |
|        |      |                                                                            |    |
| 40.436 | 0.98 | Creosol                                                                    | 98 |
|        |      | 2-Methoxy-5-methylphenol                                                   | 93 |
| 41.254 | 1.72 | Benzoic acid                                                               | 97 |
| 41.88  | 0.3  | Oxepane                                                                    | 46 |
|        |      | Cyclopentanone, 2-methyl-                                                  | 43 |
|        |      | Cyclobutane, methyl-                                                       | 43 |
|        |      |                                                                            |    |
| 41.898 | 0.18 | Bicyclo[3.1.1]heptane, 2,6,6-trimethyl-, [1R-(1.alpha.,2.beta.,5.alpha.)]- | 41 |
|        |      | Tridecanedial                                                              | 38 |
|        |      | Propenal dimethylhydrazone                                                 | 38 |
| 42.086 | 0.92 | 1-Tridecene                                                                | 98 |
|        |      | Cyclodecane                                                                | 91 |
| 42.3   | 1.5  | Tridecane                                                                  | 38 |
|        |      | Heptane, 4-methyl-                                                         | 35 |
| 42.922 | 0.95 | Cyclohexane, 1,1,2-trimethyl-                                              | 38 |
|        |      | Cyclohexane, 1,1,3,5-tetramethyl-,trans-                                   | 38 |
|        |      | Octane, 4-methyl-                                                          | 38 |
|        |      |                                                                            |    |
| 43.3   | 0.65 | Oxalic acid, allyl pentadecyl este                                         | 43 |
| 43.66  | 2.67 | 1,4:3,6-Dianhydro-.alpha.-d-glucopyranose                                  | 87 |
|        |      | 3-Aminopiperidin-2-one                                                     | 52 |
|        |      | 2-Dodecene, 4-methyl-                                                      | 47 |
|        |      | .alpha.-Irone                                                              | 47 |
| 43.986 | 0.07 | Bicyclo[3.1.0]hexane, 6-isopropylidene-1-methyl-                           | 46 |
|        |      | 1,3-Cyclohexadiene, 1-methyl-4-(1-methylethyl)-                            | 45 |
| 44.118 | 0.72 | Phenol, 4-(1-methylethyl)-                                                 | 93 |
| 44.564 | 0.4  | Phenol, 4-ethyl-2-methoxy-                                                 | 93 |
|        |      | Pyrazine, 2-methoxy-3-(1-methylethyl)-                                     | 81 |
| 44.811 | 0.25 | Naphthalene, 2-methyl-                                                     | 95 |
|        |      | Naphthalene, 1-methyl-                                                     | 94 |
| 45.006 | 0.1  | 1-Cyclohexyl-2-methyl-prop-2-en-1-one                                      | 30 |
| 45.422 | 0.38 | 2-(Chloromethyl)tetrahydropyran                                            | 58 |
|        |      | 2,6-Octadienal, 2,6-dimethyl-8-(tetrahydro-2H-2-pyranyloxy)                | 53 |
|        |      | (S)-(+)-2',3'-Dideoxyribonolactone                                         | 53 |
| 45.666 | 2.4  | 5-Hydroxymethylfurfural                                                    | 89 |
|        |      | 4-Fluorobenzyl alcohol                                                     | 47 |
| 45.842 | 1.63 | Caprolactam                                                                | 94 |
|        |      | 3,4-Dimethyl-5-hydroxy-isoxazole                                           | 60 |
| 46.442 | 0.14 | Bicyclo[3.1.1]heptan-3-one, 2,6,6-trimethyl-, (1.alpha.,2.beta.,5.alpha.)- | 50 |
|        |      | Cyclopentanone, 3-methyl-2-(2-pentenyl)-                                   | 49 |
| 46.532 | 0.3  | 9-Octadecen-1-ol, (E)-                                                     | 91 |
|        |      | 1,13-Tetradecadiene                                                        | 64 |
|        |      | 9-Decen-1-ol, trifluoroacetate                                             | 58 |
| 46.678 | 1.68 | 1-Tetradecene                                                              | 93 |
|        |      | 9-Octadecene, (E)-                                                         | 55 |
|        |      | Decyl trifluoroacetate                                                     | 55 |
| 46.85  | 0.47 | Tetradecane                                                                | 97 |
| 48.177 | 0.4  | 3-Allyl-6-methoxyphenol                                                    | 95 |
|        |      | Eugenol                                                                    | 93 |
| 48.459 | 0.69 | Biphenyl                                                                   | 86 |
| 48.875 | 0.42 | Phthalic anhydride                                                         | 38 |
|        |      | 3-(Phthalimidomethyl)benzoic acid                                          | 35 |
| 49.778 | 0.26 | Phenol, 2,6-dibromo-                                                       | 84 |

|        |      |                                                                      |    |
|--------|------|----------------------------------------------------------------------|----|
|        |      | Naphthalene, 1,6-dimethyl-                                           | 55 |
|        |      | Phenol, 2,4-dibromo-                                                 | 53 |
| 50.232 | 0.32 | Hydrazine, 1-methyl-1-phenyl-                                        | 41 |
|        |      | Benzoic acid                                                         | 41 |
|        |      | 1,2-Ethanediol, monobenzoate                                         | 38 |
| 50.367 | 0.06 | Benzaldehyde, 2,5-dimethoxy-                                         | 35 |
|        |      | 2-Furancarboxylic acid, 1-methylethyl ester                          | 30 |
|        |      | 3-Allyl-6-methoxyphenol                                              | 60 |
| 50.52  | 0.41 | Phenol, 2-methoxy-3-(2-propenyl)-                                    | 60 |
|        |      | Phenol, 2-methoxy-4-(1-propenyl)-                                    | 55 |
| 50.655 | 0.28 | 1,1'-Biphenyl, 2-methyl-                                             | 78 |
|        |      | 1-Cyclohexylheptene                                                  | 86 |
| 50.876 | 0.26 | Z-13-Octadecen-1-yl acetate                                          | 78 |
|        |      | 7-Pentadecyne                                                        | 78 |
|        |      | 1-Pentadecene                                                        | 98 |
| 51.011 | 1.18 | 1-Tridecene                                                          | 95 |
|        |      | 5-Octadecene, (E)-                                                   | 91 |
| 51.158 | 0.74 | Eicosane                                                             | 97 |
|        |      | Pentadecane                                                          | 96 |
| 52.016 | 0.42 | Vanillin                                                             | 97 |
|        |      | Benzaldehyde, 3-hydroxy-4-methoxy-                                   | 76 |
|        |      | Phenol, 2-methoxy-4-(1-propenyl)-                                    | 98 |
| 52.563 | 1.24 | trans-Isoeugenol                                                     | 97 |
|        |      | Phenol, 2-methoxy-4-(1-propenyl)-, (Z)-                              | 96 |
|        |      | Borane, 2,3-dimethyl-2-butyl- (dimer)                                | 46 |
| 53.654 | 0.19 | 9-Undecen-2-one, 6,10-dimethyl-                                      | 41 |
|        |      | 5,9-Undecadien-2-one, 6,10-dimethyl-, (Z)-                           | 35 |
| 54.303 | 0.16 | 1-[1-Methyl-2-(methyloxy)ethyl]-1-phenylhydrazine                    | 25 |
|        |      | Benzaldehyde, 3-methoxy-                                             | 25 |
|        |      | 1,12-Tridecadiene                                                    | 93 |
| 54.989 | 0.27 | 5-Nonadecen-1-ol                                                     | 90 |
|        |      | Bicyclo[3.3.2]decan-9-one                                            | 89 |
|        |      | Cetene                                                               | 98 |
| 55.105 | 1.02 | Cyclohexadecane                                                      | 96 |
| 55.225 | 0.68 | Hexadecane                                                           | 98 |
|        |      | Ethanone, 1-(3-hydroxy-4-methoxyphenyl)-                             | 90 |
| 55.547 | 0.16 | Apocynin                                                             | 90 |
|        |      | 1,4-Dimethoxy-2,3-dimethylbenzene                                    | 87 |
|        |      | 1-Cyclohexyl-2-methyl-prop-2-en-1-one                                | 53 |
| 55.686 | 0.12 | 6,11-Dimethyl-2,6,10-dodecatrien-1-ol                                | 50 |
|        |      | 3,7-Nonadien-2-one, 4,8-dimethyl-                                    | 49 |
| 57.459 | 0.52 | Phenol, 2-methoxy-4-propyl-                                          | 81 |
|        |      | Homovanillyl alcohol                                                 | 74 |
| 57.718 | 0.15 | 3-Methyl-4-nitrobenzoic acid                                         | 44 |
|        |      | 4,5,6,6a-Tetrahydro-2(1H)-pentalenone                                | 41 |
|        |      | 4(5H)-Benzofuranone, 6,7-dihydro-3,6-dimethyl-, (R)-                 | 45 |
| 57.744 | 0.07 | 1,6-Dimethyl-5-oxo-1,2,3,5-tetrahydroimidazo[1,2-a]pyrimidine        | 42 |
|        |      | N-(1-Cyclohexen-1-yl)piperidine                                      | 38 |
| 57.778 | 0.21 | Fluorene                                                             | 53 |
|        |      | 3,4,5-Trimethyl-1H-pyrano[2,3-c]pyrazol-6-one                        | 95 |
| 58.441 | 0.21 | 2,4-Dimethyl-3-acetyl-5-formylpyrrole                                | 46 |
|        |      | 1,1-Dichloro-2-methyl-3-(4,4-diformyl-1,3-butadien-1-yl)cyclopropane | 43 |
|        |      | 2-Naphthalenol                                                       | 64 |
| 58.535 | 0.21 | 1-Naphthalenol, acetate                                              | 49 |
| 58.576 | 0.04 | Chloroacetic acid, 1-naphthyl este                                   | 55 |

|        |      |                                                                                                |    |
|--------|------|------------------------------------------------------------------------------------------------|----|
|        |      | 2-Naphthyl carbamate                                                                           | 49 |
|        |      | Furan, 3-phenyl-                                                                               | 46 |
| 58.651 | 0.37 | Ethyl .alpha.-d-glucopyranoside                                                                | 49 |
|        |      | d-Gluco-heptulosan                                                                             | 46 |
|        |      | Acetamide, N-(4-hydroxycyclohexyl)-, trans-                                                    | 46 |
| 58.876 | 0.3  | 2(1H)-Benzocyclooctenone, decahydro-10a-methyl-, trans-                                        | 89 |
|        |      | E-10-Methyl-11-tetradecen-1-ol propionate                                                      | 83 |
|        |      | Ethanol, 2-(9-octadecenylloxy)-, (Z)-                                                          | 81 |
| 58.973 | 1.1  | 9-Tricosene, (Z)-                                                                              | 99 |
|        |      | E-14-Hexadecenal                                                                               | 95 |
|        |      | 3-Eicosene, (E)-                                                                               | 91 |
| 59.075 | 0.69 | Heptadecane                                                                                    | 96 |
|        |      | Octadecane                                                                                     | 94 |
| 59.393 | 0.49 | Octadecanoic acid, 2-hydroxy-1,3-propanediyl ester                                             | 27 |
| 59.697 | 0.36 | Benzene, 1,1'-(1,3-propanediyl)bis                                                             | 95 |
| 59.974 | 0.27 | Benzophenone                                                                                   | 81 |
| 60.259 | 0.17 | Methyl piperonylate, 2-hydroxy-                                                                | 40 |
|        |      | 7-Hydroxycoumarin                                                                              | 38 |
|        |      | Naphthalene, 1,2,3,4-tetrahydro-6-methoxy-                                                     | 35 |
| 60.956 | 0.48 | Pyridine-3-carboxamide, oxime, N-(2-trifluoromethylphenyl)-                                    | 91 |
|        |      | Cyclopentane, 1-pentyl-2-propyl-                                                               | 78 |
|        |      | 1,3-Dioxolane, 4-ethyl-5-octyl-2,2-bis(trifluoromethyl)-, trans-                               | 50 |
| 61.98  | 0.37 | 1-Hexadecanol, 2-methyl-                                                                       | 45 |
|        |      | (E)-pent-2-en-3-yl hexanoate                                                                   | 38 |
|        |      | Cyclohexane, 1,1,4,4-tetramethyl-                                                              | 30 |
| 62.235 | 1.06 | 3-Benzyl-5-chloro-1,2,3-triazole 1-oxide                                                       | 60 |
| 62.651 | 1.68 | 1-Octadecene                                                                                   | 99 |
|        |      | 1-Nonadecene                                                                                   | 94 |
| 62.722 | 0.59 | Octadecane                                                                                     | 95 |
|        |      | Eicosane                                                                                       | 90 |
| 63.164 | 0.37 | Tridecane, 6-propyl-                                                                           | 78 |
|        |      | Nonadecane                                                                                     | 47 |
|        |      | Nonane, 4,5-dimethyl-                                                                          | 46 |
| 63.479 | 0.24 | Phenol, 3-phenoxy-                                                                             | 47 |
|        |      | Thiazolo[5,4-f]quinoline                                                                       | 43 |
|        |      | 2-Trifluoromethyl-1H-benzimidazol                                                              | 38 |
| 63.79  | 0.38 | 11,13-Dimethyl-12-tetradecen-1-olacetate                                                       | 37 |
|        |      | Cyclohexanone, 2-(1-mercapto-1-methylethyl)-5-methyl-, trans-                                  | 35 |
|        |      | 1-Formyl-2,2-dimethyl-3-trans-(3-methyl-but-2-enyl)-6-methylidene-cyclohexane                  | 32 |
| 64.24  | 0.33 | Benzofuran-2-one, 2,3-dihydro-3,3-dimethyl-4-nitro-                                            | 25 |
| 64.484 | 0.2  | Adenosine, N-methyl-                                                                           | 38 |
| 65.117 | 0.08 | Benzene, 1,1'-(1-butenylidene)bis-                                                             | 52 |
|        |      | 1-Phenylprop-1-ene (1-3)sultine                                                                | 44 |
|        |      | Benzeneacetaldehyde, .alpha.-(phenylmethylene)-                                                | 42 |
| 65.414 | 0.25 | 3-Hydroxybiphenyl                                                                              | 70 |
|        |      | p-Hydroxybiphenyl                                                                              | 70 |
| 65.785 | 0.24 | 5-Chloro-4-methyl-8-quinolinemethanol                                                          | 53 |
|        |      | 1-Benzazirene-1-carboxylic acid, 2,2,5a-trimethyl-1a-[3-oxo-1-butenyl] perhydro-, methyl ester | 41 |
|        |      | 7-Chlorocinchoninic acid                                                                       | 35 |
| 66.16  | 2.41 | 9-Tricosene, (Z)-                                                                              | 99 |
|        |      | 1-Nonadecene                                                                                   | 98 |
| 66.711 | 0.03 | 3-Methylindole-2-carboxylic acid,4,5,6,7-tetrahydro-, ethyl ester                              | 25 |
|        |      | 1-Butyldimethylsilyloxy-2-isopropoxybenzene                                                    | 25 |
|        |      | Acetamide, 2-(2,4-dimethoxybenzylidenehydrazino)-N-ethyl-2-oxo-                                | 25 |
| 68.169 | 0.11 | Hexadecanoic acid, methyl ester                                                                | 72 |

|        |      |                                                                                       |    |
|--------|------|---------------------------------------------------------------------------------------|----|
| 68.51  | 0.47 | Cyclohexane, 1-(cyclohexylmethyl)-4-ethyl-, cis-                                      | 58 |
|        |      | Fumaric acid, 3-fluorophenyl hexadecyl ester                                          | 52 |
|        |      | Cyclohexane, 1-(cyclohexylmethyl)-4-ethyl-, trans-                                    | 46 |
| 69.462 | 0.13 | 5-Methyl-Z-5-docosene                                                                 | 49 |
|        |      | 2-Butenenitrile, 2-chloro-3-(4-methoxyphenyl)-                                        | 44 |
|        |      | Thiocarbamic acid, N,N-dimethyl, S-1,3-diphenyl-2-butenyl ester                       | 43 |
| 69.507 | 0.01 | 1H-Pyrrolo[2,3-b]pyridine-1-propionitrile, 2-phenyl-                                  | 35 |
|        |      | Benzo[h]quinoline, 2,4-dimethyl-                                                      | 35 |
| 69.672 | 2.08 | 11-Tricosene                                                                          | 99 |
|        |      | 1-Octadecene                                                                          | 98 |
|        |      | 9-Tricosene, (Z)-                                                                     | 98 |
| 71.445 | 1.61 | n-Hexadecanoic acid                                                                   | 97 |
|        |      | Tridecanoic acid                                                                      | 95 |
|        |      | n-Hexadecanoic acid                                                                   | 94 |
| 71.61  | 0.38 | 1,3-Dioxolane, 4-ethyl-5-octyl-2,2-bis(trifluoromethyl)-, trans-                      | 45 |
|        |      | 2-Methyl-5,5-diphenyl-4-(methylthio)imidazole                                         | 44 |
|        |      | Fumaric acid, pent-4-en-2-yl tridecyl ester                                           | 37 |
| 73.983 | 2.19 | 11-Tricosene                                                                          | 95 |
|        |      | Z-5-Nonadecene                                                                        | 95 |
|        |      | 9-Tricosene, (Z)-                                                                     | 93 |
| 78.421 | 0.04 | 2-(Acetoxymethyl)-3-(methoxycarbonyl)biphenylene                                      | 35 |
|        |      | Benzene, 1-phenyl-4-(2-cyano-2-phenylethenyl)                                         | 35 |
| 79.497 | 2.57 | 1-Docosene                                                                            | 97 |
|        |      | 9-Tricosene, (Z)-                                                                     | 95 |
| 79.88  | 0.27 | Acetic acid, [4-(1,1-dimethylethyl)phenoxy]-, methyl ester                            | 35 |
| 81.375 | 0.72 | 9-Octadecenoic acid, (E)-                                                             | 55 |
|        |      | Dodecahydropyrido[1,2-b]isoquinolin-6-one                                             | 46 |
|        |      | tert-Butyl(5-isopropyl-2-methylphenoxy)dimethylsilane                                 | 38 |
| 81.566 | 0.02 | [1,2,4]Triazolo[1,5-a]pyrimidine-6-carboxylic acid, 4,7-dihydro-7-imino-, ethyl ester | 35 |
|        |      | Benzene, 2-[(tert-butyldimethylsilyl)oxy]-1-isopropyl-4-methyl-                       | 30 |
| 81.6   | 0.01 | 1,2-Benzisothiazol-3-amine tbdms                                                      | 42 |
|        |      | Purine-2,6-dione, 8-(3-ethoxypropylamino)-1,3-dimethyl-3,9-dihydro-                   | 38 |
|        |      | 5-Methyl-2-phenylindolizine                                                           | 30 |
| 82.474 | 0.07 | 9-Tricosene, (Z)-                                                                     | 59 |
|        |      | Hexadecane, 1-(ethenyloxy)-                                                           | 56 |
|        |      | 13-Tetradecen-1-ol acetate                                                            | 55 |
| 82.526 | 0.07 | 9-Tricosene, (Z)-                                                                     | 90 |
|        |      | 4-Quinolinecarboxylic acid, 2-chloro-                                                 | 47 |
|        |      | Eicosane                                                                              | 43 |
| 82.556 | 0.04 | cis-Inositol tri-methylboronate                                                       | 45 |
|        |      | 5-Octadecene, (E)-                                                                    | 25 |
|        |      | Pyrido[2,3-d]pyrimidine, 4-phenyl-                                                    | 25 |
| 83.786 | 0.18 | Indolizine, 2-(4-methylphenyl)-                                                       | 38 |
|        |      | 5-Methyl-2-phenylindolizine                                                           | 35 |
|        |      | Benzo[h]quinoline, 2,4-dimethyl-                                                      | 35 |
| 83.801 | 0.12 | 1H-Indole, 5-methyl-2-phenyl-                                                         | 30 |
|        |      | 1,2,4-Triazol-3-amine, 5-(1,3,5-trimethyl-4-pyrazolyl)amino-                          | 30 |
| 86.665 | 0.96 | 1-Nonadecene                                                                          | 90 |
|        |      | 1-Heneicosyl formate                                                                  | 89 |
|        |      | Hexadecane, 1-(ethenyloxy)-                                                           | 89 |
| 86.695 | 1.24 | 1-Tricosene                                                                           | 92 |
|        |      | 9-Tricosene, (Z)-                                                                     | 91 |
|        |      | Dotriacontyl heptafluorobutyrate                                                      | 90 |
| 94.81  | 0.01 | Phenol, 4,4'-(1-methylethylidene)bis-                                                 | 95 |
| 94.878 | 0.04 | Phenol, 4,4'-(1-methylethylidene)bis-                                                 | 95 |

|         |      |                                                          |    |
|---------|------|----------------------------------------------------------|----|
|         |      | 2-Trimethylsilyl-3-trimethylsilylamino-1,2,4-triazole    | 60 |
| 94.938  | 0.06 | Phenol, 4,4'-(1-methylethylidene)bis-                    | 92 |
| 94.979  | 0.03 | Phenol, 4,4'-(1-methylethylidene)bis-                    | 64 |
| 96.115  | 2.29 | 9-Tricosene, (Z)-                                        | 96 |
|         |      | Cyclotetracosane                                         | 96 |
|         |      | 1-Nonadecene                                             | 96 |
| 108.594 | 0.7  | Octatriacontyl pentafluoropropionate                     | 90 |
|         |      | 13-Tetradecen-1-ol acetate                               | 83 |
|         |      | 1-Hexadecanol, 2-methyl-                                 | 78 |
| 108.677 | 0.09 | E-15-Heptadecenal                                        | 74 |
|         |      | Eicosane                                                 | 70 |
|         |      | 9-Tricosene, (Z)-                                        | 60 |
| 108.718 | 0.12 | 9-Tricosene, (Z)-                                        | 93 |
| 110.795 | 0.17 | (2,3-Diphenylcyclopropyl)methyl phenyl sulfoxide, trans- | 37 |
|         |      | 1-benzylindole                                           | 32 |
|         |      | Azetidine, 1-benzyl-3,3-dimethyl-2-phenyl-               | 17 |

| Table S8. Composition of Tar-F1 |       |                                                |      |
|---------------------------------|-------|------------------------------------------------|------|
| RT                              | Area% | Library/ID                                     | Qual |
| 5.998                           | 0.53  | Furan, 2-methyl-                               | 93   |
| 21.809                          | 0.44  | Styrene                                        | 83   |
|                                 |       | Bicyclo[4.2.0]octa-1,3,5-triene                | 64   |
| 31.069                          | 0.89  | Benzene, 1-ethynyl-4-methyl-                   | 91   |
|                                 |       | Indene                                         | 90   |
|                                 |       | Benzene, 1-propynyl-                           | 90   |
| 39.076                          | 11.39 | Naphthalene                                    | 95   |
|                                 |       | Azulene                                        | 94   |
| 44.5                            | 3.11  | Naphthalene, 2-methyl-                         | 97   |
|                                 |       | Naphthalene, 1-methyl-                         | 95   |
| 45.321                          | 3.07  | Naphthalene, 1-methyl-                         | 91   |
|                                 |       | 1,4-Methanonaphthalene, 1,4-dihydro            | 91   |
|                                 |       | Naphthalene, 2-methyl-                         | 91   |
| 48.151                          | 9.54  | Biphenyl                                       | 95   |
| 49.887                          | 1.64  | Acenaphthene                                   | 59   |
|                                 |       | Biphenyl                                       | 55   |
| 50.352                          | 0.93  | Naphthalene, 1-(2-propenyl)-                   | 89   |
|                                 |       | 1,1'-Biphenyl, 2-methyl-                       | 89   |
|                                 |       | 1,1'-Biphenyl, 4-methyl-                       | 76   |
| 50.801                          | 3.97  | Naphthalene, 2-ethenyl-                        | 96   |
|                                 |       | Biphenyl                                       | 87   |
| 52.128                          | 10.72 | Biphenylene                                    | 93   |
|                                 |       | Acenaphthylene                                 | 90   |
| 52.702                          | 1.03  | 1,1'-Biphenyl, 3-methyl-                       | 87   |
|                                 |       | 1,1'-Biphenyl, 3-methyl-                       | 87   |
| 53.129                          | 0.76  | 1,1'-Biphenyl, 4-methyl-                       | 83   |
|                                 |       | Naphthalene, 1-(2-propenyl)-                   | 76   |
|                                 |       | 1,1'-Biphenyl, 2-methyl-                       | 64   |
| 53.182                          | 0.3   | Acenaphthene                                   | 64   |
|                                 |       | 1,4-Ethenonaphthalene, 1,4-dihydro             | 58   |
|                                 |       | Benzene, (2,4-cyclopentadien-1-ylidenemethyl)- | 49   |
| 53.197                          | 0.55  | Acenaphthene                                   | 76   |
|                                 |       | Naphthalene, 2-ethenyl-                        | 62   |
| 54.67                           | 0.35  | Dibenzofuran                                   | 64   |
|                                 |       | 3,5-Dimethoxybenzyl alcohol                    | 64   |
| 54.689                          | 0.37  | Dibenzofuran                                   | 72   |
|                                 |       | 1(2H)-Acenaphthylenone                         | 53   |
| 55.18                           | 0.76  | 1-Naphthalenecarbonitrile                      | 87   |
|                                 |       | 2-Naphthalenecarbonitrile                      | 83   |
| 56.923                          | 0.48  | 9H-Fluorene, 9-(1-methylethyl)-                | 83   |
|                                 |       | Fluorene-9-methanol                            | 78   |
|                                 |       | 9H-Fluorene-9-carboxylic acid                  | 72   |
| 56.938                          | 0.6   | 1H-Phenalene                                   | 83   |

|        |      |                                              |    |
|--------|------|----------------------------------------------|----|
|        |      | 9H-Fluorene, 9-(1-methylethyl)-              | 78 |
|        |      | Naphthalene, 1-(2-nitro-2-propenyl)          | 64 |
| 57.493 | 6.78 | Fluorene                                     | 91 |
|        |      | Fluorene-9-methanol                          | 78 |
| 57.826 | 0.22 | 1H-Phenalene                                 | 64 |
|        |      | 9H-Fluorene-9-carboxylic acid                | 56 |
|        |      | Fluorene-9-methanol                          | 56 |
| 57.849 | 0.16 | Methyl ortho-O-aminobenzoate                 | 91 |
|        |      | 9H-Fluorene, 9-(1-methylethyl)-              | 53 |
|        |      | 5-Fluoro-3-methyl-1-benzothiophene           | 52 |
| 57.916 | 1.06 | 9H-Fluorene, 1-methyl-                       | 70 |
| 58.868 | 0.96 | (E)-Stilbene                                 | 60 |
|        |      | 9H-Fluorene, 9-methyl-                       | 60 |
|        |      | 1,1'-Biphenyl, 4-ethenyl-                    | 55 |
| 59.36  | 0.67 | Fluorene                                     | 87 |
|        |      | Benzaldehyde, 2,4-dihydroxy-3,6-dimethyl-    | 72 |
| 59.382 | 0.99 | Fluorene                                     | 90 |
|        |      | Fluorene-9-methanol                          | 86 |
| 59.689 | 0.73 | Benzophenone                                 | 90 |
| 61.556 | 0.73 | Anthracene, 1,2-dihydro-                     | 93 |
|        |      | Anthracene, 9,10-dihydro-                    | 86 |
|        |      | Phenanthrene, 9,10-dihydro-                  | 86 |
| 62.179 | 0.6  | Phenanthrene, 9,10-dihydro-                  | 86 |
|        |      | Stilbene                                     | 86 |
|        |      | Anthracene, 9,10-dihydro-                    | 83 |
| 62.194 | 0.59 | (E)-Stilbene                                 | 95 |
| 64.105 | 0.02 | Naphtho[2,3-b]norbornadiene                  | 86 |
|        |      | Anthracene, 1-methyl-                        | 70 |
|        |      | Phenanthrene, 2-methyl-                      | 64 |
| 65.519 | 18.2 | Anthracene                                   | 95 |
|        |      | Phenanthrene                                 | 95 |
| 65.875 | 3.69 | Phenanthrene                                 | 95 |
|        |      | 2-Cyclopropen-1-one, 2,3-diphenyl-           | 93 |
|        |      | Anthracene                                   | 93 |
| 67.348 | 1.87 | Naphthalene, 1-phenyl-                       | 89 |
|        |      | 1,4-Ethenoanthracene, 1,4-dihydro-           | 89 |
|        |      | Dibenzo[a,e]cyclooctene                      | 86 |
| 68.068 | 0.76 | 1H-Indene, 2-phenyl-                         | 91 |
|        |      | 1H-Cyclopropa[1]phenanthrene, 1a,9b-dihydro- | 91 |
| 69.65  | 0.83 | Phenanthrene, 2-methyl-                      | 89 |
|        |      | Anthracene, 2-methyl-                        | 86 |
|        |      | Phenanthrene, 1-methyl-                      | 64 |
| 69.886 | 0.37 | Phenanthrene, 9-methyl-                      | 55 |
|        |      | Anthracene, 9-methyl-                        | 55 |
|        |      | 1H-Indene, 2-phenyl-                         | 55 |

|        |      |                                            |    |
|--------|------|--------------------------------------------|----|
| 69.912 | 0.06 | Phenanthrene, 2-methyl-                    | 50 |
|        |      | Phenanthrene, 1-methyl-                    | 50 |
|        |      | Anthracene, 9-methyl-                      | 50 |
| 70.632 | 0.93 | 6H-Cyclobuta[jk]phenanthrene               | 64 |
|        |      | 4H-Cyclopenta[def]phenanthrene             | 59 |
| 70.654 | 0.4  | Benzaldehyde, 3,5-dichloro-2-hydroxy       | 58 |
|        |      | 4H-Cyclopenta[def]phenanthrene             | 53 |
|        |      | 6H-Cyclobuta[jk]phenanthrene               | 53 |
| 72.472 | 2.1  | Naphthalene, 2-phenyl-                     | 89 |
| 72.487 | 2    | Naphthalene, 2-phenyl-                     | 95 |
| 78.331 | 1.46 | Fluoranthene                               | 86 |
|        |      | Pyrene                                     | 76 |
| 78.354 | 1.32 | Fluoranthene                               | 89 |
|        |      | Pyrene                                     | 83 |
| 79.793 | 0.3  | Fluoranthene                               | 86 |
|        |      | Benzene, 1,1'-(1,3-butadiyne-1,4-diyl)bis- | 70 |
| 79.82  | 0.17 | Fluoranthene                               | 95 |
|        |      | Pyrene                                     | 83 |
| 81.552 | 0.17 | Pyrene                                     | 55 |
|        |      | 1,4-Pentadiyn-3-one, 1,5-diphenyl-         | 53 |
| 81.589 | 0.23 | Fluoranthene                               | 70 |
|        |      | Pyrene                                     | 60 |
| 81.619 | 0.21 | Pyrene                                     | 92 |
|        |      | Fluoranthene                               | 64 |
| 81.656 | 0.07 | Fluoranthene                               | 94 |
|        |      | Pyrene                                     | 70 |



| Table S9. Composition of Tar-F2 |       |                                      |      |
|---------------------------------|-------|--------------------------------------|------|
| RT                              | Area% | Library/ID                           | Qual |
| 5.971                           | 0.26  | Furan, 2-methyl-                     | 81   |
|                                 |       | Furan, 3-methyl-                     | 64   |
| 8.502                           | 1.85  | Benzene                              | 94   |
| 14.076                          | 0.37  | Toluene                              | 81   |
| 21.798                          | 0.77  | Styrene                              | 97   |
|                                 |       | Bicyclo[4.2.0]octa-1,3,5-triene      | 96   |
| 27.354                          | 0.01  | Isobutyronitrile                     | 37   |
|                                 |       | 4-Aminopyrimidine                    | 25   |
| 31.08                           | 0.93  | Indene                               | 97   |
|                                 |       | Benzene, 1-propynyl-                 | 94   |
| 32.193                          | 0.34  | Phosphonic acid, (p-hydroxyphenyl)   | 90   |
|                                 |       | Benzene, ethoxy-                     | 74   |
|                                 |       | Acetic acid, phenyl ester            | 74   |
| 36.62                           | 0.13  | 4-Piperidinone, 2,2,6,6-tetramethyl- | 47   |
|                                 |       | 4,4-Dimethyl-2-imidazoline           | 22   |
| 36.658                          | 0.04  | 1H-Indene, 1-methyl-                 | 50   |
|                                 |       | 1H-Indene, 3-methyl-                 | 46   |
| 37.674                          | 0.01  | Naphthalene                          | 90   |
|                                 |       | Azulene                              | 81   |
| 39.072                          | 11.8  | Naphthalene                          | 95   |
|                                 |       | Azulene                              | 91   |
| 43.829                          | 0.03  | 1H-Indene, 1-ethylidene-             | 87   |
|                                 |       | 1,4-Methanonaphthalene, 1,4-dihydro  | 87   |
|                                 |       | Benzocycloheptatriene                | 87   |
| 44.492                          | 3.06  | Naphthalene, 1-methyl-               | 91   |
|                                 |       | 1,4-Methanonaphthalene, 1,4-dihydro  | 91   |
| 45.306                          | 2.8   | Naphthalene, 2-methyl-               | 96   |
|                                 |       | Naphthalene, 1-methyl-               | 94   |
| 48.155                          | 8.66  | Biphenyl                             | 95   |
| 49.887                          | 1.32  | .beta.-(1-Naphthyl)acrylic acid      | 64   |
|                                 |       | 1-Isopropenylnaphthalene             | 64   |
|                                 |       | Acenaphthene                         | 49   |
| 50.183                          | 0.38  | Naphthalene, 1,2-dimethyl-           | 94   |
|                                 |       | Naphthalene, 1,4-dimethyl-           | 93   |
|                                 |       | Naphthalene, 2,3-dimethyl-           | 93   |
| 50.34                           | 0.41  | Diphenylmethane                      | 95   |
|                                 |       | 1,1'-Biphenyl, 3-methyl-             | 70   |
| 50.355                          | 0.37  | Diphenylmethane                      | 93   |
|                                 |       | 1,1'-Biphenyl, 2-methyl-             | 86   |
| 50.798                          | 3.4   | Naphthalene, 2-ethenyl-              | 95   |
|                                 |       | Biphenyl                             | 76   |
| 52.128                          | 8.62  | Biphenylene                          | 94   |
|                                 |       | Acenaphthylene                       | 91   |
| 52.698                          | 0.9   | 1,1'-Biphenyl, 2-methyl-             | 93   |

|        |      |                                                                              |    |
|--------|------|------------------------------------------------------------------------------|----|
|        |      | 1,1'-Biphenyl, 3-methyl-                                                     | 93 |
| 53.148 | 1.44 | 1,1'-Biphenyl, 2-methyl-                                                     | 74 |
|        |      | Naphthalene, 2-(1-methylethenyl)-                                            | 62 |
|        |      | Naphthalene, 1-(2-propenyl)-                                                 | 59 |
| 54.678 | 0.44 | Benzenemethanol, 3,4-dimethoxy-                                              | 72 |
|        |      | Dibenzofuran                                                                 | 64 |
|        |      | 3,5-Dimethoxybenzyl alcohol                                                  | 64 |
| 55.18  | 0.59 | 2-Naphthalenecarbonitrile                                                    | 90 |
| 56.559 | 0.2  | 1-Naphthalenecarbonitrile                                                    | 97 |
|        |      | 2-Naphthalenecarbonitrile                                                    | 91 |
| 56.571 | 0.16 | 1-Naphthalenecarbonitrile                                                    | 83 |
|        |      | 2-Naphthalenecarbonitrile                                                    | 72 |
| 56.93  | 0.84 | 9H-Fluorene, 9-(1-methylethyl)-                                              | 64 |
|        |      | 1H-Phenylene                                                                 | 64 |
|        |      | Fluorene-9-methanol                                                          | 59 |
| 57.481 | 2.1  | Fluorene                                                                     | 81 |
| 57.493 | 2.92 | Fluorene                                                                     | 94 |
|        |      | Fluorene-9-methanol                                                          | 78 |
| 57.781 | 0.06 | Methanesulfonic acid, 7,8,9,10-tetrahydrocyclohepta[de]naphthalen-8-yl ester | 32 |
|        |      | Diphenylacetyl chloride                                                      | 32 |
|        |      | 9,10-Anthracenedione, 1-methyl-                                              | 32 |
| 57.909 | 1.2  | 1,1'-Biphenyl, 4-ethenyl-                                                    | 70 |
|        |      | (E)-Stilbene                                                                 | 70 |
| 58.876 | 0.6  | cis-Stilbene                                                                 | 58 |
|        |      | 3H-Benz[e]indene, 2-methyl-                                                  | 52 |
|        |      | (E)-Stilbene                                                                 | 52 |
| 58.895 | 0.36 | 9H-Fluorene, 9-methyl-                                                       | 62 |
|        |      | (E)-Stilbene                                                                 | 60 |
|        |      | 9H-Fluorene, 2-methyl-                                                       | 53 |
| 59.352 | 1.2  | Fluorene                                                                     | 93 |
| 59.674 | 0.59 | Benzophenone                                                                 | 94 |
| 61.56  | 0.54 | Phenanthrene, 9,10-dihydro-                                                  | 95 |
|        |      | Phenanthrene, 1,2-dihydro-                                                   | 94 |
| 61.807 | 0.31 | 9H-Fluorene, 1-methyl-                                                       | 90 |
| 61.927 | 0.36 | 9H-Fluorene, 1-methyl-                                                       | 89 |
|        |      | 9H-Fluorene, 2-methyl-                                                       | 89 |
| 62.179 | 1.03 | Stilbene                                                                     | 91 |
|        |      | Anthracene, 9,10-dihydro-                                                    | 83 |
|        |      | cis-Stilbene                                                                 | 83 |
| 62.291 | 0.04 | 4a,9a-Methano-9H-fluorene                                                    | 42 |
|        |      | 9H-Fluorene, 2-methyl-                                                       | 25 |
|        |      | 9H-Fluorene, 9-methyl-                                                       | 25 |
| 62.595 | 0.38 | 9H-Fluorene, 2-methyl-                                                       | 42 |
|        |      | 9H-Fluorene, 1-methyl-                                                       | 42 |
|        |      | Anthracene, 1,2-dihydro-                                                     | 41 |
| 63.494 | 0.55 | 7,8-Diphenylbicyclo[4.2.1]nona-2,4 1,7-triene                                | 81 |

|        |       |                                                                                         |    |
|--------|-------|-----------------------------------------------------------------------------------------|----|
|        |       | 1,10b(2H)-Dihydropyrano[3,4,5-jk]fluorene                                               | 76 |
|        |       | Diphenylacetylene                                                                       | 70 |
| 64.098 | 0.19  | Anthracene, 9-methyl-                                                                   | 78 |
|        |       | 1H-Indene, 2-phenyl-                                                                    | 78 |
|        |       | Anthracene, 1-methyl-                                                                   | 60 |
| 64.117 | 0.27  | 1H-Cyclopropa[l]phenanthrene, 1a,9b-dihydro-                                            | 90 |
|        |       | 1H-Indene, 2-phenyl-                                                                    | 83 |
| 64.559 | 0.48  | 9H-Fluoren-9-one                                                                        | 95 |
| 65.507 | 13.76 | Anthracene                                                                              | 94 |
|        |       | Phenanthrene                                                                            | 93 |
| 65.878 | 3.08  | Anthracene                                                                              | 95 |
|        |       | Phenanthrene                                                                            | 93 |
| 66.017 | 0.06  | 9,10-Methanoanthracen-11-ol, 9,10-dihydro-9,10,11-trimethyl-                            | 49 |
|        |       | Phenanthrene, 2-methyl-                                                                 | 46 |
|        |       | 5H-Dibenzo[a,d]cycloheptene                                                             | 46 |
| 67.352 | 1.76  | Anthracene, 9-ethenyl-                                                                  | 86 |
|        |       | Cyclobuta[1",2":3,4:3",4":3',4']dicyclobuta[1,2:1',2']dibenzene,4b,4c,8b,8c-tetrahydro- | 86 |
|        |       | Dibenzo[a,e]cyclooctene                                                                 | 86 |
| 68.056 | 0.68  | 1H-Indene, 2-phenyl-                                                                    | 83 |
|        |       | Phenanthrene, 2-methyl-                                                                 | 64 |
|        |       | Phenanthrene, 4-methyl-                                                                 | 60 |
| 69.65  | 0.39  | Anthracene, 2-methyl-                                                                   | 95 |
|        |       | Anthracene, 1-methyl-                                                                   | 93 |
|        |       | 1H-Cyclopropa[l]phenanthrene, 1a,9b-dihydro-                                            | 92 |
| 69.672 | 0.32  | Anthracene, 1-methyl-                                                                   | 60 |
|        |       | Phenanthrene, 2-methyl-                                                                 | 50 |
| 69.878 | 0.5   | Phenanthrene, 1-methyl-                                                                 | 95 |
|        |       | Anthracene, 2-methyl-                                                                   | 92 |
|        |       | Phenanthrene, 2-methyl-                                                                 | 92 |
| 69.908 | 0.39  | Phenanthrene, 2-methyl-                                                                 | 83 |
|        |       | Anthracene, 9-methyl-                                                                   | 83 |
| 70.635 | 1.73  | 4H-Cyclopenta[def]phenanthrene                                                          | 58 |
|        |       | 6H-Cyclobuta[jk]phenanthrene                                                            | 50 |
| 70.755 | 0.21  | Anthracene, 1-methyl-                                                                   | 52 |
| 70.875 | 0.7   | Phenanthrene, 2-methyl-                                                                 | 83 |
|        |       | Phenanthrene, 1-methyl-                                                                 | 78 |
|        |       | Anthracene, 2-methyl-                                                                   | 78 |
| 72.472 | 3.5   | Naphthalene, 2-phenyl-                                                                  | 95 |
| 75.947 | 0.59  | 1,2,4,8-Tetramethylbicyclo[6.3.0]undeca-2,4-diene                                       | 60 |
|        |       | Tricyclo[8.2.2.2(4,7)]hexadeca-2,4,6,8,10,12,13,15-octaene                              | 35 |
|        |       | 6-Phenylbenzocyclohepten-7-one                                                          | 27 |
| 76.69  | 0.36  | Tricyclo[8.2.2.2(4,7)]hexadeca-2,4                                                      | 52 |
|        |       | ,6,8,10,12,13,15-octaene                                                                |    |
|        |       | Naphthalene, 2-phenyl-                                                                  | 38 |
| 76.712 | 0.41  | Tricyclo[8.2.2.2(4,7)]hexadeca-2,4                                                      | 47 |
|        |       | ,6,8,10,12,13,15-octaene                                                                |    |

|        |      |                                            |    |
|--------|------|--------------------------------------------|----|
|        |      | [1,1'-Biphenyl]-4,4'-dicarbonitril         | 44 |
|        |      | [1,1'-Biphenyl]-2,2'-dicarbonitril         | 38 |
| 78.346 | 2.26 | Pyrene                                     | 94 |
|        |      | Fluoranthene                               | 94 |
| 79.831 | 2.04 | Fluoranthene                               | 93 |
|        |      | Benzene, 1,1'-(1,3-butadiyne-1,4-diyl)bis- | 70 |
| 81.12  | 0.56 | Fluoranthene                               | 46 |
|        |      | 4,4'-Bis(tetrahydrothiopyran)              | 42 |
|        |      | Benzene, 1,1'-(1,3-butadiyne-1,4-diyl)bis- | 41 |
| 81.154 | 0.16 | Fluoranthene                               | 46 |
|        |      | Pyrene                                     | 41 |
| 81.615 | 3.19 | Pyrene                                     | 89 |
|        |      | Fluoranthene                               | 89 |
| 88.385 | 0.06 | 11H-Benzo[b]fluorene                       | 87 |
| 88.408 | 0.03 | 11H-Benzo[b]fluorene                       | 55 |
|        |      | Fluoranthene, 2-methyl-                    | 55 |

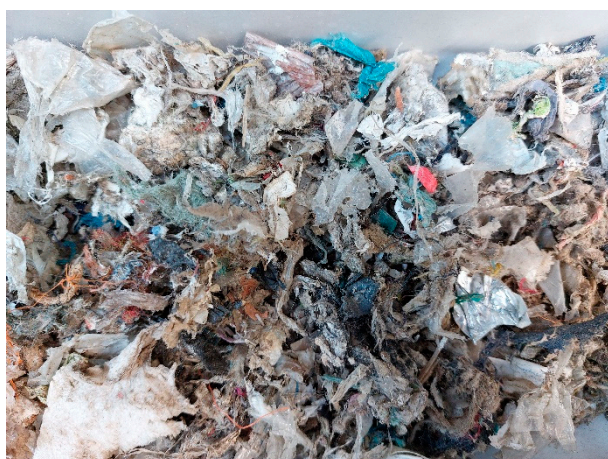

**Fig. S2** RDF used as feedstock

**Table S10-Proximate analysis results**

| <b>RDF-raw</b>                         |       |
|----------------------------------------|-------|
| Humidity (wt.%)                        | 36.03 |
| Volatile (wt.%)                        | 50.70 |
| Volatile (wt.%) dry basis              | 79.24 |
| Volatile (wt.%) dry ash free basis     | 89.29 |
| Fixed Carbon (wt.%)                    | 6.07  |
| Fixed carbon (wt.%) dry basis          | 9.49  |
| Fixed carbon (wt.%) dry ash free basis | 10.69 |
| Ashes (wt.%)                           | 7.20  |
| <b>RDF-dry</b>                         |       |
| Humidity (wt.%)                        | 3.74  |
| Volatile (wt.%)                        | 72.8  |
| Volatile (wt.%) dry basis              | 75.63 |
| Volatile (wt.%) dry ash free basis     | 89.06 |
| Ashes (wt.%)                           | 14.5  |
| Fixed carbon (wt.%)                    | 8.95  |
| Fixed carbon (wt.%) dry basis          | 9.30  |
| Fixed carbon (wt.%) dry ash free basis | 10.94 |
| <b>RDF-milled</b>                      |       |
| Humidity (wt.%)                        | 1.61  |
| Volatile (wt.%)                        | 80.7  |
| Volatile (wt.%) dry basis              | 82.03 |
| Volatile (wt.%) dry ash free basis     | 90.35 |
| Ashes (wt.%)                           | 9.05  |
| Fixed carbon (wt.%)                    | 8.70  |
| Fixed carbon (wt.%) dry basis          | 8.84  |
| Fixed carbon (wt.%) dry ash free basis | 9.74  |

**Table S11** Micro GC Column Technical Specifications (T = 70 °C).

| Column | Type     | Lenght (m) | Thickness (µm) | Carrier gas | Molecules detected          |
|--------|----------|------------|----------------|-------------|-----------------------------|
| A      | OV-1     | 8          | 1.2            | He          | C2-C6                       |
| B      | Allumina | 14         | 5              | He          | C2-C6                       |
| C      | PLOT-U   | 8          | 3              | He          | C2H6, C2H4, C3H8, C3H6, CO2 |
| D      | MS5A     | 10         | 12             | Ar          | H2, CO, N2, CH4, O2         |

The gas used to carry the gaseous species through A, B, C columns is helium, while argon was used as carrier in column D. The column OV-1 and Alumina allow the determination of C<sub>2</sub>-C<sub>6</sub> hydrocarbons. PLOT-U column gives the CH<sub>4</sub>, C<sub>2</sub>H<sub>4</sub>, C<sub>2</sub>H<sub>6</sub> and C<sub>3</sub>H<sub>6</sub> concentration, while H<sub>2</sub>, CO<sub>2</sub> and CO are determined through MS5A column.

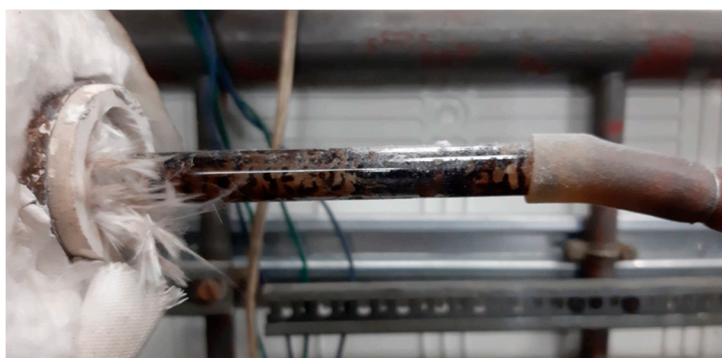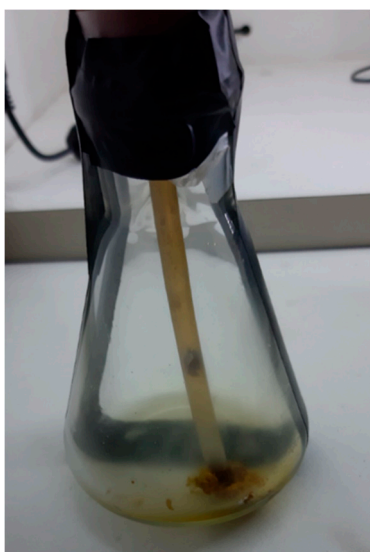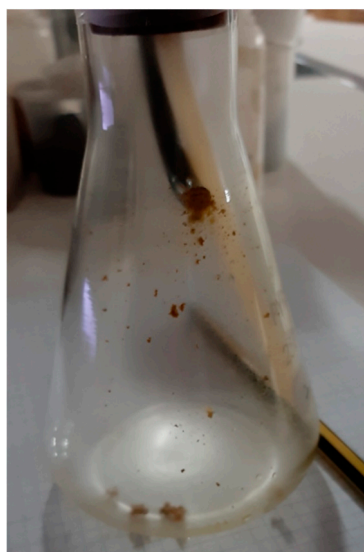

**Figure S3:** Waxy residue stacked on the reactor wall (up); Condensed residues collected in the flasks (down).
